# Supplementary material for: Over-reassurance and undersupport after a ‘false alarm’: a systematic review of the impact on subsequent cancer symptom attribution and help seeking
Source: PubMed Central journal article supplement (PMC4322204; doi:10.1136/bmjopen-2014-007002), 2015-02-04
Supplement: bmjopen-2014-007002.draft_revisions.pdf [file bmjopen-2014-007002.draft_revisions.pdf]

# BMJ Open

## Over-reassurance and under-support after a 'false alarm': a review of the impact on subsequent cancer symptom attribution and help-seeking

|                                 |                                                                                                                                                                             |
|---------------------------------|-----------------------------------------------------------------------------------------------------------------------------------------------------------------------------|
| Journal:                        | <i>BMJ Open</i>                                                                                                                                                             |
| Manuscript ID:                  | bmjopen-2014-007002                                                                                                                                                         |
| Article Type:                   | Research                                                                                                                                                                    |
| Date Submitted by the Author:   | 24-Oct-2014                                                                                                                                                                 |
| Complete List of Authors:       | Renzi, Cristina; UCL,<br>Whitaker, Katriina; UCL,<br>Wardle, Jane; UCL,                                                                                                     |
| <b>Primary Subject Heading</b>: | Oncology                                                                                                                                                                    |
| Secondary Subject Heading:      | Communication, General practice / Family practice, Health services research, Public health, Qualitative research                                                            |
| Keywords:                       | GENERAL MEDICINE (see Internal Medicine), Quality in health care < HEALTH SERVICES ADMINISTRATION & MANAGEMENT, ONCOLOGY, PRIMARY CARE, PUBLIC HEALTH, QUALITATIVE RESEARCH |
|                                 |                                                                                                                                                                             |

SCHOLARONE™  
Manuscripts

1  
2  
3  
4 **Over-reassurance and under-support after a ‘false alarm’: a review of the impact on**  
5  
6 **subsequent cancer symptom attribution and help-seeking**  
7  
8

9  
10  
11  
12 Cristina Renzi, Katriina L Whitaker and Jane Wardle

13  
14  
15 *University College London - Health Behaviour Research Centre*  
16  
17  
18  
19  
20  
21

22 **Corresponding author:** Cristina Renzi

23  
24 University College London  
25 Department of Epidemiology and Public Health  
26 Health Behaviour Research Centre  
27 1-19 Torrington Place  
28 London WC1E 6BT  
29 UK

30  
31 **E-mail:** c.renzi@ucl.ac.uk  
32  
33  
34  
35  
36  
37  
38

39 **Key words:** cancer symptoms, help-seeking, delay, diagnosis, review  
40  
41  
42

43  
44 **Word Count:** 3,290  
45  
46  
47  
48  
49  
50  
51  
52  
53  
54  
55  
56  
57  
58  
59  
60

## ABSTRACT

**Objectives:** This literature review examined research into the impact of a previous 'all-clear' or non-cancer diagnosis following symptomatic presentation ('false alarm') on symptom attribution and delays in help-seeking for subsequent possible cancer symptoms.

**Design and setting:** The comprehensive literature review included original research based on quantitative, qualitative and mixed data collection methods. We used a combination of search strategies, including in-depth searches of electronic databases (PubMed, EMBASE, PsychInfo), searching key authors and articles listed as 'related' in PubMed, and reference lists. We performed a narrative synthesis of key themes shared across studies.

**Participants:** The review included studies published after 1990 on adult patients having experienced a false alarm following symptomatic presentation. We excluded false alarms in the context of screening.

**Primary and secondary outcome measures:** We evaluated the effect of a 'false alarm' on symptom awareness and help-seeking for new or recurrent possible cancer symptoms.

**Results:** Overall 1442 papers were screened and 121 retrieved for full-text evaluation. Among them, 19 reported on false alarms and subsequent symptom appraisal or help-seeking. They used qualitative (n=14), quantitative (n=3), and mixed methods (n=2). Breast (n=7), gynaecological (n=3), colorectal (n=2), testicular (n=2), and head and neck cancers (n=2), were the most studied. Two broad themes emerged underlying delays in help-seeking: i) over-reassurance from the previous 'all-clear' diagnosis leading to subsequent symptoms being interpreted as benign, and ii) unsupportive healthcare experiences in which symptoms were dismissed, leaving patients concerned about appearing hypochondriacal or uncertain about the appropriate next actions. The evidence suggested that the effect of a false alarm can persist for months and even years.

1  
2 **Conclusions:** In conclusion, over-reassurance and under-support of patients after a false  
3  
4 alarm can undermine help-seeking in the case of new or recurrent potential cancer symptoms,  
5  
6 highlighting the need for appropriate patient information when investigations rule out cancer.  
7  
8

9  
10  
11 **ARTICLE SUMMARY**

12  
13 **Strengths and limitations of this study**

- 14  
15  
16  
17  
18  
19  
20  
21  
22  
23  
24  
25  
26  
27  
28  
29  
30  
31  
32  
33  
34  
35  
36  
37  
38  
39  
40  
41  
42  
43  
44  
45  
46  
47  
48  
49  
50  
51  
52  
53  
54  
55  
56  
57  
58  
59  
60
- The review addresses an under-researched issue, which impacts on a large number of individuals as more than 80% of patients undergoing cancer investigations receive a 'non-cancer' diagnosis (here termed 'false alarm').
  - By integrating the available evidence from qualitative, quantitative and mixed methods studies this review allowed us to identify areas that need to be addressed in order to reduce the risk of delayed help-seeking after a previous false alarm.
  - Over-reassurance and under-support of patients can be an unintended consequence of a false alarm leading to delays in help-seeking for subsequent cancer symptoms. The effect on delayed help-seeking can persist for months and even years.
  - The included studies were mainly based on qualitative data collection methods and were limited by small sample size, retrospective design and lack of control groups.
  - Prospective studies are needed to identify the appropriate forms of patient-information to avoid unintended consequences of false alarms on subsequent symptom appraisal and help-seeking.

## INTRODUCTION

Patient, doctor and system delays have all been implicated in poorer cancer survival<sup>1 2</sup>, with particular concern in the UK that these factors are leading to worse cancer outcomes compared with other countries<sup>3-7</sup>. Public awareness campaigns designed to promote earlier presentation with potential cancer symptoms, alongside improved access to diagnostic investigations, have been increasingly advocated to diagnose cancer at an early stage and improve prognosis<sup>8 9</sup>. However, only a minority of individuals undergoing urgent cancer investigations are diagnosed with cancer, with more than 80% receiving an 'all-clear' or non-cancer diagnosis (here called a 'false alarm')<sup>10-12</sup>. This makes it important to consider the possible unintended consequences of a false alarm.

Several studies<sup>11 13-15</sup> have shown that investigations for a suspected cancer can have negative effects, even for individuals ultimately diagnosed with a benign condition. Anxiety, psychological distress<sup>11 14</sup>, and immunoendocrine changes<sup>15</sup> can persist for weeks or months after a benign diagnosis. In addition, an association between false alarms and subsequent delayed diagnosis has been reported for various cancers<sup>2 6 16-19</sup>, with both patients and healthcare providers contributing to delays<sup>6</sup>. However, evidence on the specific processes linking a false alarm to subsequent delays in help-seeking is fragmentary. A qualitative synthesis of patients' help-seeking highlighted the influence of a benign diagnosis on subsequent symptom attribution as well as worry about wasting the doctor's time as two important factors<sup>20</sup>. Delay in help-seeking has also been attributed to the distress caused by a false alarm, and to reassurance from a benign diagnosis<sup>21</sup>.

According to the model of pathways to treatment<sup>22</sup>, the process to diagnosis is dynamic with 'forward and backward movement'. The speed and direction of progress through the diagnostic pathway is influenced by patient, healthcare and disease related factors. This dynamic process involves both patients and healthcare providers reconsidering and

1  
2 reappraising symptoms repeatedly over time. Following a previous all-clear diagnosis,  
3  
4 emotional and cognitive factors might play a role in influencing symptom attribution and  
5  
6 help-seeking, affecting subsequent progress through the diagnostic pathway.  
7  
8

9  
10 The aim of this study is to review the available international literature to increase our  
11  
12 understanding of the processes linking an all-clear diagnosis to subsequent delays, and in  
13  
14 particular to examine the impact on subsequent symptom appraisal and help-seeking.  
15  
16

## 17 18 19 **METHODS**

20  
21  
22 The literature review included original research using quantitative, qualitative and mixed data  
23  
24 collection methods. Identification of relevant qualitative papers is often difficult because  
25  
26 indexing is less well-developed than for quantitative studies<sup>20</sup>, so we relied on a combination  
27  
28 of search strategies, including in-depth searches of electronic databases (PubMed, EMBASE,  
29  
30 and PsychInfo) using MeSH and free text key words, searching names of key authors and  
31  
32 articles listed as 'related' in PubMed, and searching the references in relevant publications.  
33  
34

35  
36  
37 The search combined sets of the following keywords: cancer, delay, diagnostic interval,  
38  
39 diagnostic pathway, help-seeking, attitudes, benign, negative, false alarm, all-clear, non-  
40  
41 cancer, anxiety, fear, distress, psychological, awareness, symptoms, reassurance, cancer  
42  
43 referral, repeat, investigation, examination and test. Studies were included if they evaluated  
44  
45 the effect of health examinations that did not result in a cancer diagnosis (here called a 'false  
46  
47 alarm') on subsequent symptom awareness, help-seeking, or time to diagnosis, for new or  
48  
49 recurrent possible cancer symptoms.  
50  
51

52  
53 The focus of the review was on symptomatic patients, because the effect of a false alarm  
54  
55 might be different if it occurs in the context of screening rather than symptomatic  
56  
57 presentation<sup>23</sup>. We therefore excluded studies on false alarms following screening. We also  
58  
59  
60

1  
2 excluded studies examining only the emotional effects of investigations for suspected cancer,  
3  
4 as previous reviews are available on this topic<sup>11 13-15</sup>. Publications on childhood cancers were  
5  
6 excluded, as were editorials and reviews. We included studies published after 1990.  
7  
8

9  
10 Initially each reference was assigned a quality score<sup>24</sup>. However, considering the limited  
11  
12 number of studies, and in line with previous publications<sup>20</sup>, we decided not to use quality  
13  
14 scores or a formal appraisal checklist<sup>25</sup>, but rather to take an inclusive approach aimed at  
15  
16 identifying research that could give a relevant contribution.  
17  
18

19  
20 We examined the findings of individual studies and performed a narrative synthesis of key  
21  
22 themes shared across studies<sup>26</sup>. Papers were read systematically by two reviewers (CR and  
23  
24 KLW), key concepts were recorded, and their relationship with a false alarm was explored.  
25  
26 Papers were read repeatedly in order to identify additional concepts and to identify common  
27  
28 or contrasting themes across studies. We have used relevant quotes from selected qualitative  
29  
30 and mixed studies to illustrate our findings.  
31  
32  
33  
34  
35

## 36 RESULTS

37  
38  
39 We initially identified 1442 articles, of which 121 were selected, based on the title and  
40  
41 abstract, for full-text evaluation (Figure 1). Of these, 19 articles reported information on  
42  
43 symptomatic patients with a false alarm, and considered the impact on symptom attribution,  
44  
45 help-seeking, or diagnostic delay for subsequent potential cancer symptoms.  
46  
47  
48

49  
50 The most frequently studied cancer was breast cancer (n=7 studies), followed by  
51  
52 gynaecological (n=3), colorectal (n=2), testicular (n=2), head and neck (n=2), brain cancer  
53  
54 (n=1) and multiple cancer sites (n=2) (Table 1). The majority of studies were carried out in  
55  
56 the UK (n=6) and the USA (n=6).  
57  
58  
59  
60

**Table 1: Summary information on included studies**

| Authors                | Country   | Study type and data collection method                                              | Participants                                                                                                                                     | Cancer site    |
|------------------------|-----------|------------------------------------------------------------------------------------|--------------------------------------------------------------------------------------------------------------------------------------------------|----------------|
| Bain et al (2002)      | UK        | Qualitative interviews                                                             | 95 cancer patients                                                                                                                               | Colorectal     |
| Beacham et al (2004)   | USA       | Prospective observational (Telephone questionnaire)                                | 37 women with benign breast biopsy following self-detected lump, 65 following screening and control group of 76 women without biopsy             | Breast         |
| Chapple et al (2004)   | UK        | Qualitative interviews                                                             | 45 cancer patients                                                                                                                               | Testicular     |
| Evans et al (2007)     | UK        | Qualitative interviews                                                             | 43 cancer patients                                                                                                                               | Gynaecological |
| Facione et al (1995)   | USA       | Qualitative interviews                                                             | 39 cancer patients                                                                                                                               | Breast         |
| Facione et al (2006)   | USA       | Qualitative interviews                                                             | 28 women with possible breast cancer symptoms                                                                                                    | Breast         |
| Fitch et al (2002)     | Canada    | Qualitative interviews                                                             | 18 cancer patients                                                                                                                               | Gynaecological |
| Gascoigne et al (1999) | UK        | Qualitative interviews                                                             | 6 cancer patients (and 5 relatives)                                                                                                              | Testicular     |
| Granek et al (2012)    | Canada    | Qualitative interviews                                                             | 14 cancer patients (and 7 partners)                                                                                                              | Breast         |
| Heisey et al (2011)    | Canada    | Qualitative interviews                                                             | 14 cancer patients; 10 GPs                                                                                                                       | Breast         |
| Janz et al (1990)      | USA       | Prospective observational (Telephone questionnaire)                                | 83 women with benign biopsy after self-discovered breast problem (and control group of 393 women with no breast problem)                         | Breast         |
| Jones et al (2010)     | Australia | Cross-sectional (Telephone questionnaire)                                          | 3005 participants from the general population with potential breast cancer symptoms                                                              | Breast         |
| Salander et al (1999)  | Sweden    | Qualitative interviews                                                             | 28 cancer patients and 27 spouses                                                                                                                | Brain          |
| Scott et al (2007)     | UK        | Qualitative interviews                                                             | 57 cancer patients                                                                                                                               | Head and Neck  |
| Siminoff et al (2011)  | USA       | Qualitative interviews (and review of medical records)                             | 242 cancer patients                                                                                                                              | Colorectal     |
| Tarling et al (2013)   | UK        | Prospective observational (Mixed-methods: questionnaire and focus groups)          | 55 women with non-cancer diagnosis after urgent referral for post-menopausal bleeding (35 completed questionnaire and 15 completed focus groups) | Gynaecological |
| Tishelman et al (1998) | Sweden    | Qualitative interviews                                                             | 46 cancer patients (and 29 relatives)                                                                                                            | Multiple sites |
| Tromp et al (2005)     | NL        | Case-series (Mixed methods: questionnaire, interviews and physician questionnaire) | 306 cancer patients                                                                                                                              | Head and Neck  |
| Underwood et al (1994) | USA       | Qualitative interviews                                                             | 46 cancer patients                                                                                                                               | Multiple sites |



Most studies used qualitative methods (n=14), with quantitative (n=3) and mixed methods (n=2) less frequently employed. They were predominantly retrospective or cross-sectional, with only three having a prospective design. Sample sizes were mainly small and varied between 6 and 3005 participants (median 45; mean 242).

The studies provided information on the following potential consequences of a false alarm: delayed help-seeking for cancer symptoms (n=17 studies), time to diagnosis/delay (n=15), experience of reassurance (n=15), symptom awareness/attribution (n=11), perceptions of having been dismissed by the doctor (n=10), lack of information or communication (n=7), and psychological effects (anxiety, distress, fear) (n=4). Despite differences by cancer site, study populations, and data collection methods, two broad themes emerged across studies: 'over-reassurance' and 'under-support'.

### 'Over-reassurance' following a non-cancer diagnosis

One of the main themes emerging across studies was patients explaining delay in help-seeking as due to reassurance from a previous benign or non-cancer diagnosis<sup>21 27-40</sup> (Table 2).

**Table 2: Factors influencing delayed help-seeking in relation to a previous all-clear diagnosis, based on the available evidence**

| Main themes                         | References                                                                                                                                                                                                                                                                                                                          |
|-------------------------------------|-------------------------------------------------------------------------------------------------------------------------------------------------------------------------------------------------------------------------------------------------------------------------------------------------------------------------------------|
| Reassurance                         | Bain et al (2002); Chapple et al (2004); Evans et al (2007); Facione et al (1995); Facione et al (2006); Fitch et al (2002); Gascoigne et al (1999); Heisey et al (2011); Jones et al (2010); Salander et al (1999); Scott et al (2007); Siminoff et al (2011); Tishelman et al (1998); Tromp et al (2005); Underwood et al (1994). |
| Symptom awareness/attribution       | Bain et al (2002); Beacham et al (2004); Evans et al (2007); Facione et al (1995); Granek et al (2012); Heisey et al (2011); Janz et al (1990); Jones et al (2010); Salander et al (1999); Scott et al (2007); Tromp et al (2005).                                                                                                  |
| Perception of having been dismissed | Evans et al (2007); Facione et al (2006); Fitch et al (2002); Gascoigne et al (1999); Granek et al (2012); Heisey et al (2011); Salander et al (1999); Siminoff et al (2011); Tishelman et al (1998); Underwood et al (1994).                                                                                                       |
| Lack of information/communication   | Evans et al (2007); Facione et al (2006); Fitch et al (2002); Siminoff et al (2011); Tarling et al (2013); Tromp et al (2005); Underwood et al (1994).                                                                                                                                                                              |
| Anxiety, distress, fear             | Beacham et al (2004); Chapple et al (2004); Tarling et al (2013); Tromp et al (2005).                                                                                                                                                                                                                                               |

1  
2  
3  
4  
5 Among a general population sample of 3005 women with breast symptoms, the single most  
6 common reason for not seeing a doctor when experiencing a breast lump was that they had  
7 seen a doctor about it before (reported by 15.7% of women)<sup>36</sup>. A study of 242 colorectal  
8 cancer (CRC) patients showed that a delayed diagnosis was associated with having received  
9 an initial non-cancer diagnosis (10.2 months vs. 2.4 months;  $p < 0.001$ ), or having been  
10 initially told not to worry or to continue to monitor symptoms (6.8 months vs. 4.4 months;  
11  $p = 0.006$ )<sup>39</sup>. A study of 306 head and neck cancer patients showed that delayed help-seeking  
12 was associated with patients interpreting symptoms as innocent partly because of reassurance  
13 during the first visit<sup>27</sup>.

14  
15  
16 Qualitative studies illustrate how over-reassurance can lead to normalization of symptoms  
17 and subsequent delayed help-seeking: "*He [physician] gave me an examination and said*  
18 *'there was nothing there'. So you go home and live with the problem.*"(No.20; CRC patient)<sup>28</sup>.  
19  
20 "*He (surgeon) did a colonoscopy...He was relieved because he didn't find anything- so I did*  
21 *nothing for about two years and the blood wasn't getting any worse on the toilet paper.*"(No.  
22 48; CRC patient)<sup>28</sup>.

23  
24  
25 Having been reassured by previous examinations, some patients - and some physicians-  
26 attributed subsequent symptoms to benign conditions<sup>21 27 28 31 33 36-38 41</sup>. Breast cancer patients  
27 reported retrospectively: "*It was fibro [something]. Yeah, benign...So...I don't know...I mean*  
28 *it was a few years later, the breast started to feel a similar kind of way. I said, oh, it's the*  
29 *same thing, you know...And I ignored it.*"(P9)<sup>21</sup>. "*When I did an exam one day I found a*  
30 *different lump in each breast. I was used to them...I was thinking, 'Oh, here we go again.'* And  
31 *maybe for a minute you might think 'Gee, I hope it's not positive' but that went very quickly.*  
32  
33 *The more biopsies I had, the less concerned I was that they would be positive.*" (Woman with

1  
2 four prior benign incisional biopsies)<sup>31</sup>. Some studies have even shown a decrease in breast  
3 self-examination after a benign breast biopsy performed for a self-detected lump<sup>23 42</sup>.  
4  
5

6  
7 Similarly, ovarian cancer<sup>33</sup> and brain tumour patients<sup>37</sup> reported delays in help-seeking and  
8 specialist referral because symptoms were attributed to a previous benign condition or other  
9 reasonable explanations after an initial non-cancer diagnosis and negative tests. Likewise, for  
10 testicular cancer, a diagnosis such as a cyst or urinary infection led to subsequent  
11 interpretation of symptoms by patients and physicians in line with the previous benign  
12 diagnosis, with delays in help-seeking and diagnosis of up to 12 months<sup>35</sup>.  
13  
14  
15  
16  
17  
18  
19  
20

21  
22 It is possible that symptom characteristics might moderate the effect of a false alarm<sup>27-29 33 34</sup>  
23  
24 <sup>37-39</sup>. For example, among women with breast symptoms, a previous visit with a non-cancer  
25 diagnosis was a relatively frequent explanation for delayed help-seeking in the case of a  
26 breast lump (reported by 15.7% of women), while it was less frequently mentioned as a  
27 reason for delay in the case of other symptoms, such as swelling in the armpit, pain or change  
28 in breast shape or size<sup>36</sup>.  
29  
30  
31  
32  
33  
34  
35  
36  
37  
38  
39

#### 40 **'Under-support' following a non-cancer diagnosis**

41  
42 The second broad theme was the patient's perception of previously not having been taken  
43 seriously, or symptoms having been dismissed as unimportant, as well as a sense of  
44 humiliation or concern about appearing hypochondriacal<sup>21 29 31-35 37 39-41</sup> (Table 2). Women  
45 with breast symptoms who had delayed seeking help for a year reported that the delay was  
46 influenced by concerns about appearing hypochondriacal or foolish, following an experience  
47 of being dismissed or treated with disrespect: *"I've had my symptoms dismissed as frivolous*  
48 *twice"*<sup>32</sup>. *"Well, because I'd had identical symptoms over 20 years before, years before, and it*  
49 *had been mastitis. And at that time I had worried about cancer and was basically kind of*  
50  
51  
52  
53  
54  
55  
56  
57  
58  
59  
60

1  
2 *laughed at and...and I felt foolish about how I'd been so worried...I was very humiliated, I*  
3  
4 *was very embarrassed." (Donna, 63, breast cancer)<sup>41</sup> "...so having been dismissed the first*  
5  
6 *time, I said, I'm overreacting, just leave it alone. So that's why I'm saying that my first*  
7  
8 *experience kind of influenced me even getting the follow-up the first time I noticed any slight*  
9  
10 *change." (P9)<sup>21</sup>. Patients with testicular cancer also described long delays before seeking help*  
11  
12 *again for persistent symptoms: "Saw the general (senior?) registrar who examined me and*  
13  
14 *told me there was nothing wrong with me and gave me one hell of a telling off for not*  
15  
16 *listening to his registrar, and politely told me to bugger off and not to waste his time*  
17  
18 *again."<sup>35</sup>. Similarly, gastro-intestinal cancer patients reported: "They had a very negative*  
19  
20 *attitude; I wasn't really believed. They said it was psychosomatic. I was reluctant to try and*  
21  
22 *get help after that."<sup>29</sup>.*  
23  
24  
25  
26

27  
28 A number of studies reported that previous visits with a non-cancer diagnosis left the patients  
29  
30 frustrated, with a sense that doctors could not help them and uncertainty about what to do  
31  
32 next; these factors contributed to subsequent delays<sup>27 32-34 39 40 43</sup>. Of 155 head and neck  
33  
34 cancer patients having initially received an all-clear, 50% waited more than three weeks  
35  
36 before returning to the doctor, and 10% more than four months; some explained their delay  
37  
38 with the fact that the doctor could not help the first time<sup>27</sup>. Likewise, lack of explanation  
39  
40 about the possible causes and meaning of symptoms, and lack of advice on further actions  
41  
42 after investigations for post-menopausal bleeding can delay subsequent help-seeking<sup>43</sup>.  
43  
44

45 Women reported a sense of frustration and not knowing what to do in case of recurrent  
46  
47 symptoms: "*It's the not knowing. It's more frustrating. Why is it still happening? Mine has*  
48  
49 *not changed that much. After going through all that. It puts you off going again, because they*  
50  
51 *don't know and they don't tell you anything else." (P2)<sup>43</sup>. Similar explanations for delayed*  
52  
53 *help-seeking were reported by breast cancer patients<sup>32 40</sup>: "I've had no relief from seeing a*  
54  
55 *physician."<sup>32</sup> Also ovarian cancer patients explained delays as due to frustration and not*  
56  
57 *having previously discussed with the doctor any alternative diagnostic hypothesis or planned*  
58  
59  
60

1  
2 any follow-up or further actions<sup>33</sup>. Among CRC patients, lack of communication of the next  
3  
4 steps during the initial visit was associated with longer diagnostic delay (8.2 months vs. 3.4  
5  
6 months;  $p < 0.001$ )<sup>39</sup>.  
7

8  
9  
10 The other explanation for delay was anxiety or distress following the previous non-cancer  
11  
12 diagnosis, reported by some women with recurrent post-menopausal bleeding after a false  
13  
14 alarm<sup>43</sup>, and by some head and neck cancer patients<sup>27</sup>. Among patients with testicular cancer,  
15  
16 some reported fear of painful investigations following previous health examinations: "*And*  
17  
18 *then when I did go and see this GP, there was a locum, and he gave me an inspection, and I*  
19  
20 *found it quite uncomfortable, the way he went about the inspection. And so I further delayed.*  
21  
22 *You know, he had referred me to somebody else. And I delayed that...*" "...it was  
23  
24 *excruciatingly painful, you know, I didn't like that, you know, and I suppose anyone does like*  
25  
26 *that sort of thing. Anyway, it was my own fault that I delayed the thing.*"(T45)<sup>30</sup>.  
27  
28  
29  
30  
31

## 32 33 **DISCUSSION**

34  
35 An 'all-clear' or non-cancer diagnosis can be associated with subsequent delays in help-  
36  
37 seeking in the case of new or recurrent possible cancer symptoms. Our review of a largely  
38  
39 qualitative literature has shown that across different cancer sites and study populations, some  
40  
41 common themes emerged to help explain the relationship between a false alarm and  
42  
43 subsequent delays. The two main themes were 'over-reassurance', resulting in subsequent  
44  
45 attribution of symptoms to the initial benign diagnosis or normalizing of symptoms, and  
46  
47 'under-support', resulting in symptomatic patients being unwilling to seek medical attention  
48  
49 again. Many of the studies report on prolonged delays, suggesting that the effects of a false  
50  
51 alarm can be long-lasting, and may generalize beyond recurrence of the original symptom to  
52  
53 new symptoms appearing some time later. In the case of breast symptoms, a benign  
54  
55 diagnosis appeared to give some women a false sense of security persisting for many years.  
56  
57  
58  
59  
60

1  
2 This sense of security is at odds with the need to remain vigilant, particularly in the light of  
3  
4 recent evidence showing that women with a histologically proven benign breast biopsy can  
5  
6 have a 2-3 fold increased risk of being subsequently diagnosed with breast cancer<sup>44 45</sup>.  
7

8  
9 Around 2% of women with a benign breast disease are diagnosed with breast cancer during  
10  
11 the following 7 years<sup>45</sup>, with the lesion being considered a marker for increased risk, rather  
12  
13 than a premalignant lesion in itself. In a single institution study in the US, 13% of breast  
14  
15 cancer diagnoses involved women presenting with a palpable mass who had a negative  
16  
17 mammogram within the last year, and 21% had had a mammogram one year or more  
18  
19 before<sup>46</sup>. Also for CRC, there is evidence supporting the need to remain vigilant even after  
20  
21 negative investigations: up to 8% of cases are diagnosed within three to five years of a  
22  
23 negative colonoscopy, possibly because of missed cancers or cancers arising from missed or  
24  
25 incompletely removed polyps<sup>47</sup>. In a single institution study in the UK, the diagnostic yield of  
26  
27 a second urgent referral, although lower than the first referral (5% vs 10%), is not  
28  
29 insignificant<sup>48</sup>.  
30  
31

32  
33 Our review has shown that under-supporting patients receiving an all-clear diagnosis can  
34  
35 negatively impact future symptom interpretation and help-seeking. The perception that  
36  
37 symptoms were previously dismissed as unimportant was a relevant theme explaining  
38  
39 subsequent delays, most often because of not wanting to appear hypochondriacal. Patients'  
40  
41 concerns about wasting the doctor's time, which previous studies reported as a common  
42  
43 barrier for help-seeking in the UK<sup>20 49 50</sup>, was mentioned by some patients, but appeared to  
44  
45 play a less relevant role.  
46  
47

48  
49 Fear of cancer or of the consequences of treatment has been previously shown to be a barrier  
50  
51 for help-seeking<sup>20 51</sup>. Our review suggested that fear of examinations or high anxiety levels  
52  
53 after a false alarm contributed to delays only in a minority of cases. Other factors seemed  
54  
55 more relevant, such as a sense of frustration, uncertainty about what to do next, and not  
56  
57  
58  
59  
60

1  
2  
3  
4  
5  
6  
7  
8  
9  
10  
11  
12  
13  
14  
15  
16  
17  
18  
19  
20  
21  
22  
23  
24  
25  
26  
27  
28  
29  
30  
31  
32  
33  
34  
35  
36  
37  
38  
39  
40  
41  
42  
43  
44  
45  
46  
47  
48  
49  
50  
51  
52  
53  
54  
55  
56  
57  
58  
59  
60

having discussed any alternative diagnostic hypothesis or follow-up at the time of the initial consultation.

The need to provide patients with more information in the case of a non-cancer diagnosis has also been highlighted in a study on ‘straight to test’ endoscopy services for suspected CRC<sup>52</sup>: more than 30% of patients would prefer to see a specialist even after normal or benign test results. A clinical encounter providing information before and after diagnostic investigations may be valuable to ensure that bodily sensations are not dismissed following negative examinations, and to discuss next steps in the case of recurrent or new symptoms.

Our review and previous studies<sup>37 53</sup> have shown that over-reassurance from normal test results or a benign diagnosis can influence patients and healthcare providers, possibly affecting time to diagnosis. Planned follow-up soon after the initial diagnosis can help mitigate the risks associated with overconfidence in the first diagnosis; it allows the clinician to apply more conscious problem-solving and for the possibility of alternative diagnostic hypothesis to emerge, with symptom changes guiding this process<sup>54</sup>. Primary care physicians can also be under-supported in terms of not having sufficient access to diagnostic investigations<sup>8 55</sup>. For example, one in ten GPs in the UK had tests for ovarian cancer refused<sup>56</sup>. Further studies based on healthcare providers’ experiences are needed.

In the UK, urgent cancer examinations have risen over time, but this is inevitably followed by a decrease in the diagnostic yield<sup>48 57</sup>. More patients will experience a false alarm as a consequence of initiatives promoting earlier symptomatic presentation and improved access to diagnostic investigations<sup>8 9</sup>. Despite being unavoidable if early diagnosis and survival are to be improved, especially for cancers presenting with non-specific symptoms and in the absence of accurate markers for discriminating between high and low risk individuals, effort is required to minimize unintended consequences. Significant event audits in primary care have highlighted the need to find a balance between avoiding unnecessary anxiety in



1  
2 symptomatic patients and the potential risks of over-reassuring patients with an all-clear  
3 diagnosis<sup>53</sup>. Recommendations similar to those developed for children with acute diseases  
4 have been suggested for safety-netting and preventing delays in cancer diagnosis<sup>53 58</sup>. These  
5 include communicating to patients that there is uncertainty and that more visits might be  
6 necessary for reaching a diagnosis, explaining exactly what symptoms merit special attention,  
7 giving advice on how to seek help if necessary, and explaining the expected development of  
8 the illness over time.  
9

10  
11 There are some limitations to our review. The majority of studies did not have the specific  
12 objective of evaluating false alarms, and relevant information emerged only after in-depth  
13 examination of full-text publications. Thus, we cannot exclude the possibility that some  
14 studies were not identified in our review. The included studies were limited by small sample  
15 size, retrospective design and lack of control groups. More prospective studies are needed,  
16 also including information provided by healthcare professionals.  
17

18  
19 The majority of studies were conducted in English-speaking countries, mainly the UK and the  
20 USA, with a few from Northern Europe. This might reflect policies and initiatives addressing  
21 earlier cancer diagnosis having taken place in these countries. Publication bias might also  
22 influence the number of studies from different countries. More international comparisons,  
23 including central and southern European countries could provide a different perspective on  
24 common issues.  
25

26  
27 An 'all-clear' diagnosis in terms of cancer can result from a variety of different clinical  
28 scenarios, including a true benign diagnosis, a false negative result, or the healthcare provider  
29 attributing symptoms to alternative explanations. Our study was not able to stratify by these  
30 factors, but we did not identify any specific differences regarding the effect on reassurance,  
31 symptom interpretation and help-seeking, of either type of, or time since, the false alarm.  
32

33  
34 Larger prospective studies are needed to explore these issues.  
35  
36



1  
2 In conclusion, we found that a false alarm can influence subsequent symptom attribution and  
3 help-seeking, principally through patients being either ‘over-reassured’ or ‘under-supported’  
4 in relation to future symptoms. Providing patients with appropriate balanced information  
5 when investigations rule out cancer may help to prevent subsequent delays. Prospective  
6 studies are needed to identify forms of patient-information that limit unintended  
7 consequences of false alarms.  
8  
9  
10  
11  
12  
13  
14  
15  
16  
17

18 **Financial support:** This work was supported by Cancer Research UK [C48748/A16867]

19 **Conflict of interest:** The authors have no conflict of interest to declare.

20 **Data sharing:** Extra data is available by emailing [c.renzi@ucl.ac.uk](mailto:c.renzi@ucl.ac.uk).

21  
22 **Contributorship statement:** CR and JW designed the study. CR was responsible for data  
23 collection. CR and KLW performed data extraction and appraising studies. CR, KLW and JW  
24 contributed to data analysis and interpretation. CR wrote the first draft of the manuscript. All  
25 authors reviewed the manuscript and approved the final version. CR is responsible for the  
26 overall content as the corresponding author.  
27  
28  
29  
30  
31  
32  
33  
34  
35  
36

## 37 REFERENCES

- 38 1. Richards MA, Westcombe AM, Love SB, et al. Influence of delay on survival in patients  
39 with breast cancer: a systematic review. *Lancet* 1999;**353**(9159):1119-26.
- 40 2. Mitchell E, Macdonald S, Campbell NC, et al. Influences on pre-hospital delay in the  
41 diagnosis of colorectal cancer: a systematic review. *Br J Cancer* 2008;**98**(1):60-  
42 70.
- 43 3. Hamilton W, Green T, Martins T, et al. Evaluation of risk assessment tools for  
44 suspected cancer in general practice: a cohort study. *British Journal of General  
45 Practice* 2013;**63**(606):e30-e36.
- 46 4. Berrino F, De Angelis R, Sant M, et al. Survival for eight major cancers and all cancers  
47 combined for European adults diagnosed in 1995-99: results of the EURO CARE-4  
48 study. *Lancet Oncol* 2007;**8**(9):773-83.
- 49 5. Coleman MP, Forman D, Bryant H, et al. Cancer survival in Australia, Canada,  
50 Denmark, Norway, Sweden, and the UK, 1995-2007 (the International Cancer  
51 Benchmarking Partnership): an analysis of population-based cancer registry  
52 data. *Lancet* 2011;**377**(9760):127-38.  
53  
54  
55  
56  
57  
58  
59  
60

- 1  
2  
3  
4  
5  
6  
7  
8  
9  
10  
11  
12  
13  
14  
15  
16  
17  
18  
19  
20  
21  
22  
23  
24  
25  
26  
27  
28  
29  
30  
31  
32  
33  
34  
35  
36  
37  
38  
39  
40  
41  
42  
43  
44  
45  
46  
47  
48  
49  
50  
51  
52  
53  
54  
55  
56  
57  
58  
59  
60
6. Macleod U, Mitchell ED, Burgess C, et al. Risk factors for delayed presentation and referral of symptomatic cancer: evidence for common cancers. *Br J Cancer* 2009;**101 Suppl 2**:S92-S101.
7. Richards MA. The size of the prize for earlier diagnosis of cancer in England. *Br J Cancer* 2009;**101 Suppl 2**:S125-9.
8. Rubin G, Vedsted P, Emery J. Improving cancer outcomes: better access to diagnostics in primary care could be critical. *British Journal of General Practice* 2011;**61**(586):317-18.
9. Cancer Research UK. National Awareness and Early Diagnosis Initiative. Accessed at [www.cancerresearchuk.org/cancer-info/spotcancerearly/naedi/AboutNAEDI/](http://www.cancerresearchuk.org/cancer-info/spotcancerearly/naedi/AboutNAEDI/) on July 10th 2014. Secondary National Awareness and Early Diagnosis Initiative. Accessed at [www.cancerresearchuk.org/cancer-info/spotcancerearly/naedi/AboutNAEDI/](http://www.cancerresearchuk.org/cancer-info/spotcancerearly/naedi/AboutNAEDI/) on July 10th 2014. <http://www.cancerresearchuk.org/cancer-info/spotcancerearly/naedi/AboutNAEDI/>.
10. Thorne K, Hutchings HA, Elwyn G. The effects of the Two-Week Rule on NHS colorectal cancer diagnostic services: a systematic literature review. *BMC health services research* 2006;**6**:43.
11. Pelletier M, Knauper B, Loisel CG, et al. Moderators of psychological recovery from benign cancer screening results. *Current oncology* 2012;**19**(3):e191-200.
12. Baughan P, Keatings J, O'Neill B. Urgent suspected cancer referrals from general practice: audit of compliance with guidelines and referral outcomes. *The British journal of general practice : the journal of the Royal College of General Practitioners* 2011;**61**(592):e700-6.
13. Montgomery M, McCrone SH. Psychological distress associated with the diagnostic phase for suspected breast cancer: systematic review. *J Adv Nurs* 2010;**66**(11):2372-90.
14. Andrykowski MA, Carpenter JS, Studts JL, et al. Psychological impact of benign breast biopsy: A longitudinal, comparative study. *Health Psychology* 2002;**21**(5):485-94.
15. Witek-Janusek L, Gabram S, Mathews HL. Psychologic stress, reduced NK cell activity, and cytokine dysregulation in women experiencing diagnostic breast biopsy. *Psychoneuroendocrinology* 2007;**32**(1):22-35.
16. Arndt V, Stürmer T, Stegmaier C, et al. Provider Delay Among Patients With Breast Cancer in Germany: A Population-Based Study. *Journal of Clinical Oncology* 2003;**21**(8):1440-46.
17. Arndt V, Sturmer T, Stegmaier C, et al. Patient delay and stage of diagnosis among breast cancer patients in Germany - a population based study. *Br J Cancer* 2002;**86**(7):1034-40.
18. Hogberg C, Karling P, Rutegard J, et al. Immunochemical faecal occult blood tests in primary care and the risk of delay in the diagnosis of colorectal cancer. *Scandinavian journal of primary health care* 2013;**31**(4):209-14.
19. Macdonald S, Macleod U, Campbell NC, et al. Systematic review of factors influencing patient and practitioner delay in diagnosis of upper gastrointestinal cancer. *Br J Cancer* 2006;**94**(9):1272-80.
20. Smith LK, Pope C, Botha JL. Patients' help-seeking experiences and delay in cancer presentation: a qualitative synthesis. *The Lancet* 2005;**366**(9488):825-31.
21. Heisey R, Clemons M, Granek L, et al. Health care strategies to promote earlier presentation of symptomatic breast cancer: perspectives of women and family physicians. *Current oncology* 2011;**18**(5):e227-37.

- 1
  - 2
  - 3
  - 4
  - 5
  - 6
  - 7
  - 8
  - 9
  - 10
  - 11
  - 12
  - 13
  - 14
  - 15
  - 16
  - 17
  - 18
  - 19
  - 20
  - 21
  - 22
  - 23
  - 24
  - 25
  - 26
  - 27
  - 28
  - 29
  - 30
  - 31
  - 32
  - 33
  - 34
  - 35
  - 36
  - 37
  - 38
  - 39
  - 40
  - 41
  - 42
  - 43
  - 44
  - 45
  - 46
  - 47
  - 48
  - 49
  - 50
  - 51
  - 52
  - 53
  - 54
  - 55
  - 56
  - 57
  - 58
  - 59
  - 60
22. Scott SE, Walter FM, Webster A, et al. The model of pathways to treatment: conceptualization and integration with existing theory. *Br J Health Psychol* 2013;**18**(1):45-65.
23. Beacham AO, Carpenter JS, Andrykowski MA. Impact of benign breast biopsy upon breast self-examination. *Preventive medicine* 2004;**38**(6):723-31.
24. Dubayova T, van Dijk JP, Nagyova I, et al. The impact of the intensity of fear on patient's delay regarding health care seeking behavior: a systematic review. *Int J Public Health* 2010;**55**(5):459-68.
25. Pace R, Pluye P, Bartlett G, et al. Testing the reliability and efficiency of the pilot Mixed Methods Appraisal Tool (MMAT) for systematic mixed studies review. *International Journal of Nursing Studies* 2012;**49**(1):47-53.
26. Petticrew M, Rehfuess E, Noyes J, et al. Synthesizing evidence on complex interventions: how meta-analytical, qualitative, and mixed-method approaches can contribute. *Journal of clinical epidemiology* 2013;**66**(11):1230-43.
27. Tromp DM, Brouha XD, Hordijk G-J, et al. Patient factors associated with delay in primary care among patients with head and neck carcinoma: A case-series analysis. *Family Practice* 2005;**22**(5):554-59.
28. Bain NS, Campbell NC, Ritchie LD, et al. Striking the right balance in colorectal cancer care—a qualitative study of rural and urban patients. *Family Practice* 2002;**19**(4):369-74.
29. Tishelman C, Sachs L. The Diagnostic Process and the Boundaries of Normality. *Qualitative Health Research* 1998;**8**(1):48-60.
30. Chapple A, Ziebland S, McPherson A. Qualitative study of men's perceptions of why treatment delays occur in the UK for those with testicular cancer. *British Journal of General Practice* 2004;**54**(498):25-32.
31. Facione NC, Dodd MJ. Women's narratives of helpseeking for breast cancer. *Cancer Practice* 1995;**3**(4):219-25.
32. Facione NC, Facione PA. The cognitive structuring of patient delay in breast cancer. *Social Science & Medicine* 2006;**63**(12):3137-49.
33. Evans J, Ziebland S, McPherson A. Minimizing delays in ovarian cancer diagnosis: an expansion of Andersen's model of 'total patient delay'. *Family Practice* 2007;**24**(1):48-55.
34. Fitch M, Deane K, Howell D, et al. Women's experiences with ovarian cancer: reflections on being diagnosed. *Can Oncol Nurs J* 2002;**12**(3):152-68.
35. Gascoigne P, Mason M, Roberts E. Factors affecting presentation and delay in patients with testicular cancer: Results of a qualitative study. *Psycho-Oncology* 1999;**8**(2):144-54.
36. Jones SC, Gregory P, Nehill C, et al. Australian women's awareness of breast cancer symptoms and responses to potential symptoms. *Cancer Causes and Control* 2010;**21**(6):945-58.
37. Salander P, Bergenheim AT, Hamberg K, et al. Pathways from symptoms to medical care: a descriptive study of symptom development and obstacles to early diagnosis in brain tumour patients. *Family Practice* 1999;**16**(2):143-48.
38. Scott SE, McGurk M, Grunfeld EA. The process of symptom appraisal: Cognitive and emotional responses to detecting potentially malignant oral symptoms. *Journal of Psychosomatic Research* 2007;**62**(6):621-30.
39. Siminoff LA, Rogers HL, Thomson MD, et al. Doctor, what's wrong with me? Factors that delay the diagnosis of colorectal cancer. *Patient Education and Counseling* 2011;**84**(3):352-58.

- 1
- 2
- 3 40. Underwood SM, Hoskins D, Cummins T, et al. Obstacles to cancer care: focus on the
- 4 economically disadvantaged. *Oncol Nurs Forum* 1994;**21**(1):47-52.
- 5 41. Granek L, Fergus K. Resistance, agency, and liminality in women's accounts of
- 6 symptom appraisal and help-seeking upon discovery of a breast irregularity. *Soc*
- 7 *Sci Med* 2012;**75**(10):1753-61.
- 8 42. Janz NK, Becker MH, Haefner DP, et al. Determinants of breast self-examination after
- 9 a benign biopsy. *American journal of preventive medicine* 1990;**6**(2):84-92.
- 10 43. Tarling R, Gale A, Martin-Hirsch P, et al. Experiences of women referred for urgent
- 11 assessment of postmenopausal bleeding (PMB). *J Obstet Gynaecol*
- 12 2013;**33**(2):184-7.
- 13 44. Shin S, Schneider HB, Cole FJ, Jr., et al. Follow-up recommendations for benign breast
- 14 biopsies. *The breast journal* 2006;**12**(5):413-7.
- 15 45. Goldacre MJ, Abisgold JD, Yeates DG, et al. Benign breast disease and subsequent
- 16 breast cancer: English record linkage studies. *Journal of public health*
- 17 2010;**32**(4):565-71.
- 18 46. Haakinson DJ, Stucky CC, Dueck AC, et al. A significant number of women present
- 19 with palpable breast cancer even with a normal mammogram within 1 year. *Am J*
- 20 *Surg* 2010;**200**(6):712-7; discussion 17-8.
- 21 47. Dominitz JA, Robertson DJ. Editorial: Interval Cancers: Learning from the Past as We
- 22 Build for the Future. *The American journal of gastroenterology*
- 23 2013;**108**(8):1341-43.
- 24 48. Vaughan-Shaw PG, Cutting JE, Borley NR, et al. Repeat 2-week wait referrals for
- 25 colorectal cancer. *Colorectal disease : the official journal of the Association of*
- 26 *Coloproctology of Great Britain and Ireland* 2013;**15**(3):292-7.
- 27 49. Robb K, Stubbings S, Ramirez A, et al. Public awareness of cancer in Britain: a
- 28 population-based survey of adults. *Br J Cancer* 2009;**101** Suppl 2:S18-23.
- 29 50. Forbes LJ, Simon AE, Warburton F, et al. Differences in cancer awareness and beliefs
- 30 between Australia, Canada, Denmark, Norway, Sweden and the UK (the
- 31 International Cancer Benchmarking Partnership): do they contribute to
- 32 differences in cancer survival? *Br J Cancer* 2013;**108**(2):292-300.
- 33 51. Beeken RJ, Simon AE, von Wagner C, et al. Cancer fatalism: deterring early
- 34 presentation and increasing social inequalities? *Cancer epidemiology,*
- 35 *biomarkers & prevention : a publication of the American Association for Cancer*
- 36 *Research, cosponsored by the American Society of Preventive Oncology*
- 37 2011;**20**(10):2127-31.
- 38 52. Hitchins CR, Lawn A, Whitehouse G, et al. The Straight To Test Endoscopy Service for
- 39 Suspected Colorectal Cancer: meeting national targets but are we meeting our
- 40 patients' expectations? *Colorectal disease : the official journal of the Association*
- 41 *of Coloproctology of Great Britain and Ireland* 2014.
- 42 53. Mitchell ED, Rubin G, Macleod U. Understanding diagnosis of lung cancer in primary
- 43 care: qualitative synthesis of significant event audit reports. *British Journal of*
- 44 *General Practice* 2013;**63**(606):e37-e46.
- 45 54. Berner ES, Graber ML. Overconfidence as a Cause of Diagnostic Error in Medicine.
- 46 *The American Journal of Medicine* 2008;**121**(5, Supplement):S2-S23.
- 47 55. Vedsted P, Olesen F. Are the serious problems in cancer survival partly rooted in
- 48 gatekeeper principles? An ecologic study. *The British journal of general practice :*
- 49 *the journal of the Royal College of General Practitioners* 2011;**61**(589):e508-12.
- 50 56. Target Ovarian Cancer. The 2012 Target Ovarian Cancer Pathfinder Study. Accessed
- 51 at [www.targetovariancancer.org.uk](http://www.targetovariancancer.org.uk) on July 10th 2014. Secondary Target Ovarian
- 52
- 53
- 54
- 55
- 56
- 57
- 58
- 59
- 60

- 1  
2  
3 Cancer. The 2012 Target Ovarian Cancer Pathfinder Study. Accessed at  
4 [www.targetovariancancer.org.uk](http://www.targetovariancancer.org.uk) on July 10th 2014.  
5  
6 57. Allgar VL, Neal RD, Ali N, et al. Urgent GP referrals for suspected lung, colorectal,  
7 prostate and ovarian cancer. The British journal of general practice : the journal  
8 of the Royal College of General Practitioners 2006;**56**(526):355-62.  
9  
10 58. Almond S, Mant D, Thompson M. Diagnostic safety-netting. The British journal of  
11 general practice : the journal of the Royal College of General Practitioners  
12 2009;**59**(568):872-4; discussion 74.  
13  
14  
15  
16  
17  
18  
19  
20  
21  
22  
23  
24  
25  
26  
27  
28  
29  
30  
31  
32  
33  
34  
35  
36  
37  
38  
39  
40  
41  
42  
43  
44  
45  
46  
47  
48  
49  
50  
51  
52  
53  
54  
55  
56  
57  
58  
59  
60

Figure 1: Flow of studies

1  
2  
3  
4  
5  
6  
7  
8  
9  
10  
11  
12  
13  
14  
15  
16  
17  
18  
19  
20  
21  
22  
23  
24  
25  
26  
27  
28  
29  
30  
31  
32  
33  
34  
35  
36  
37  
38  
39  
40  
41  
42  
43  
44  
45  
46  
47  
48  
49  
50  
51  
52  
53  
54  
55  
56  
57  
58  
59  
60

For peer review only

Potentially relevant articles identified and title and abstract screened for retrieval (n=1442)

Studies excluded following review of title and abstract (n=1321)

Studies retrieved for detailed full-text evaluation (n=121)

Studies excluded:

- Outcomes not relevant
- Study population not relevant (children, non-cancer patients, developing countries)
- Editorials, reviews, commentaries
- Studies on false alarm related to screening

Studies on false alarm for symptomatic patients and subsequent impact in case of cancer symptoms (n=19)

# BMJ Open

## Over-reassurance and under-support after a 'false alarm': a systematic review of the impact on subsequent cancer symptom attribution and help-seeking

|                                 |                                                                                                                                                                             |
|---------------------------------|-----------------------------------------------------------------------------------------------------------------------------------------------------------------------------|
| Journal:                        | <i>BMJ Open</i>                                                                                                                                                             |
| Manuscript ID:                  | bmjopen-2014-007002.R1                                                                                                                                                      |
| Article Type:                   | Research                                                                                                                                                                    |
| Date Submitted by the Author:   | 16-Jan-2015                                                                                                                                                                 |
| Complete List of Authors:       | Renzi, Cristina; UCL,<br>Whitaker, Katriina; UCL,<br>Wardle, Jane; UCL,                                                                                                     |
| <b>Primary Subject Heading</b>: | Oncology                                                                                                                                                                    |
| Secondary Subject Heading:      | Communication, General practice / Family practice, Health services research, Public health, Qualitative research                                                            |
| Keywords:                       | GENERAL MEDICINE (see Internal Medicine), Quality in health care < HEALTH SERVICES ADMINISTRATION & MANAGEMENT, ONCOLOGY, PRIMARY CARE, PUBLIC HEALTH, QUALITATIVE RESEARCH |
|                                 |                                                                                                                                                                             |

SCHOLARONE™  
Manuscripts



1  
2  
3  
4 **Over-reassurance and under-support after a ‘false alarm’: a systematic review of the**  
5  
6 **impact on subsequent cancer symptom attribution and help-seeking**  
7  
8

9  
10  
11  
12 Cristina Renzi, Katriina L Whitaker and Jane Wardle

13  
14  
15 *University College London - Health Behaviour Research Centre*  
16  
17  
18  
19  
20  
21

22 **Corresponding author:** Cristina Renzi

23  
24 University College London  
25 Department of Epidemiology and Public Health  
26 Health Behaviour Research Centre  
27 1-19 Torrington Place  
28 London WC1E 6BT  
29 UK  
30

31 **E-mail:** c.renzi@ucl.ac.uk  
32  
33  
34  
35  
36  
37  
38

39 **Key words:** cancer symptoms, help-seeking, delay, diagnosis, review  
40  
41  
42

43  
44 **Word Count:** 4,132  
45  
46  
47  
48  
49  
50  
51  
52  
53  
54  
55  
56  
57  
58  
59  
60



## ABSTRACT

**Objectives:** This literature review examined research into the impact of a previous 'all-clear' or non-cancer diagnosis following symptomatic presentation ('false alarm') on symptom attribution and delays in help-seeking for subsequent possible cancer symptoms.

**Design and setting:** The comprehensive literature review included original research based on quantitative, qualitative and mixed data collection methods. We used a combination of search strategies, including in-depth searches of electronic databases (PubMed, EMBASE, PsychInfo), searching key authors and articles listed as 'related' in PubMed, and reference lists. We performed a narrative synthesis of key themes shared across studies.

**Participants:** The review included studies published after 1990 and before February 2014 reporting information on adult patients having experienced a false alarm following symptomatic presentation. We excluded false alarms in the context of screening.

**Primary and secondary outcome measures:** We evaluated the effect of a 'false alarm' on symptom attribution and help-seeking for new or recurrent possible cancer symptoms.

**Results:** Overall 1442 papers were screened and 121 retrieved for full-text evaluation. Among them, 19 reported on false alarms and subsequent symptom attribution or help-seeking. They used qualitative (n=14), quantitative (n=3), and mixed methods (n=2). Breast (n=7), gynaecological (n=3), colorectal (n=2), testicular (n=2), and head and neck cancers (n=2), were the most studied. Two broad themes emerged underlying delays in help-seeking: i) over-reassurance from the previous 'all-clear' diagnosis leading to subsequent symptoms being interpreted as benign, and ii) unsupportive healthcare experiences in which symptoms were dismissed, leaving patients concerned about appearing hypochondriacal or uncertain about the appropriate next actions. The evidence suggested that the effect of a false alarm can persist for months and even years.

1  
2 **Conclusions:** In conclusion, over-reassurance and under-support of patients after a false  
3  
4 alarm can undermine help-seeking in the case of new or recurrent potential cancer symptoms,  
5  
6 highlighting the need for appropriate patient information when investigations rule out cancer.  
7  
8

9  
10  
11 **ARTICLE SUMMARY**

12  
13 **Strengths and limitations of this study**

- 14  
15  
16 • The review addresses an under-researched issue, which impacts on a large number of  
17 individuals as more than 80% of patients undergoing cancer investigations receive a  
18 'non-cancer' diagnosis (here termed 'false alarm').  
19  
20 • By integrating the available evidence from qualitative, quantitative and mixed  
21 methods studies this review allowed us to identify areas that need to be addressed in  
22 order to reduce the risk of delayed help-seeking after a previous false alarm.  
23  
24 • Over-reassurance and under-support of patients can be an unintended consequence of  
25 a false alarm leading to delays in help-seeking for subsequent cancer symptoms. The  
26 effect on delayed help-seeking can persist for months and even years.  
27  
28 • The included studies were mainly based on qualitative data collection methods and  
29 were limited by small sample size, retrospective design and lack of control groups.  
30  
31 • Prospective studies are needed to identify the appropriate forms of patient-information  
32 to avoid unintended consequences of false alarms on subsequent symptom attribution  
33 and help-seeking.  
34  
35  
36  
37  
38  
39  
40  
41  
42  
43  
44  
45  
46  
47  
48  
49  
50  
51  
52  
53  
54  
55  
56  
57  
58  
59  
60

## INTRODUCTION

Patient, doctor and system delays have all been implicated in poorer cancer survival[1 2], with particular concern in the UK that these factors are leading to worse cancer outcomes compared with other countries[3-7]. Public awareness campaigns designed to promote earlier presentation with potential cancer symptoms, alongside improved access to diagnostic investigations, have been increasingly advocated to diagnose cancer at an early stage and improve prognosis[8 9]. However, only a minority of symptomatic individuals undergoing urgent cancer investigations are diagnosed with cancer, with more than 80% receiving an 'all-clear' or non-cancer diagnosis (here called a 'false alarm')[10-12]. This makes it important to consider the possible unintended consequences of a false alarm.

Several studies[11 13-15] have shown that investigations for a suspected cancer can have negative effects, even for individuals ultimately diagnosed with a benign condition. Anxiety, psychological distress[11 14], and immunoendocrine changes[15] can persist for weeks or months after a benign diagnosis. In addition, an association between false alarms and subsequent delayed diagnosis has been reported for various cancers[2 6 16-19], with both patients and healthcare providers contributing to delays[6]. However, evidence on the specific processes linking a false alarm to subsequent delays in help-seeking is fragmentary. A qualitative synthesis of patients' help-seeking highlighted the influence of a benign diagnosis on subsequent symptom attribution as well as worry about wasting the doctor's time as two important factors[20]. Delay in help-seeking has also been attributed to the distress caused by a false alarm, and to reassurance from a benign diagnosis[21].

Several studies have examined the psychological impact of benign or false positive results of cancer screening[11 22 23] and some broader inferences can be made based on their findings. However, the psychological and behavioural consequences of a screening-related false alarm might not be generalizable to symptomatic patients, as highlighted by previous studies[24]. Thus, for our review we focused specifically on symptomatic patients.

1  
2  
3  
4  
5 According to the model of pathways to treatment[25], the process to diagnosis is dynamic  
6  
7 with 'forward and backward movement'. The speed and direction of progress through the  
8  
9 diagnostic pathway is influenced by patient, healthcare and disease related factors. This  
10  
11 dynamic process involves both patients and healthcare providers reconsidering and  
12  
13 reappraising symptoms repeatedly over time. Following a previous all-clear diagnosis,  
14  
15 emotional and cognitive factors might play a role in influencing symptom attribution and  
16  
17 help-seeking, affecting subsequent progress through the diagnostic pathway.  
18  
19

20  
21  
22 The aim of this study is to review the available international literature to increase our  
23  
24 understanding of the processes linking an all-clear diagnosis to subsequent delays, and in  
25  
26 particular to examine the impact on subsequent symptom attribution and help-seeking.  
27  
28

## 29 30 31 **METHODS**

32  
33  
34 The literature review included original research using quantitative, qualitative and mixed data  
35  
36 collection methods. Identification of relevant qualitative papers is often difficult because  
37  
38 indexing is less well-developed than for quantitative studies[20], so we relied on a  
39  
40 combination of search strategies, including in-depth searches of electronic databases  
41  
42 (PubMed, EMBASE, and PsychInfo) using MeSH and free text key words, searching names  
43  
44 of key authors and articles listed as 'related' in PubMed, and searching the references in  
45  
46 relevant publications.  
47  
48

49  
50  
51 The systematic search combined sets of the following groups of keywords: 1) cancer; 2)  
52  
53 delay, diagnostic interval, diagnostic pathway; 3) benign, negative, false alarm, all-clear, non-  
54  
55 cancer, false positive; 4) symptoms; 5) help-seeking, attitudes; awareness, anxiety, fear,  
56  
57 distress, psychological, , reassurance; 6) referral, repeat, investigation, examination and test.  
58  
59  
60

1  
2 Within each group, keywords were combined using ‘OR’ and different groups were  
3  
4 combined using ‘AND’. Various combinations were used in an iterative process based on the  
5  
6 preliminary information obtained from identified sources. This iterative search and a  
7  
8 ‘snowball’ approach, with one reference leading to others[26] proved essential because the  
9  
10 majority of studies were not directly addressing our research question, but relevant  
11  
12 information emerged once the sources were examined in detail. Studies were included if they  
13  
14 evaluated the effect of health examinations that did not result in a cancer diagnosis (here  
15  
16 called a ‘false alarm’) on subsequent symptom attribution, help-seeking, or time to diagnosis,  
17  
18 for new or recurrent possible cancer symptoms.  
19  
20

21  
22 The focus of the review was on symptomatic patients, because the effect of a false alarm  
23  
24 might be different if it occurs in the context of screening rather than symptomatic  
25  
26 presentation[24 27]. We therefore excluded studies on false alarms following screening. We  
27  
28 also excluded studies examining only the emotional effects of investigations for suspected  
29  
30 cancer, as previous reviews are available on this topic[11 13-15]. Publications on childhood  
31  
32 cancers were excluded, as were editorials and reviews. We included studies published after  
33  
34 1990 and before February 2014 and no language restrictions were applied.  
35  
36

37  
38 Initially, one reviewer (CR) conducted the search and screened titles and abstracts. After  
39  
40 having excluded irrelevant studies, two reviewers (CR and KLW) independently evaluated  
41  
42 the full text of the remaining publications, appraised the studies and performed data  
43  
44 extraction. Any disagreement was resolved via a discussion.  
45  
46  
47

48  
49 In order to extract relevant data we followed standard methods[28]: the papers were read  
50  
51 systematically by two reviewers (CR and KLW), key concepts were recorded, and their  
52  
53 relationship with a false alarm was explored. Papers were read repeatedly in order to identify  
54  
55 additional concepts and identify common or contrasting themes across studies. Using the  
56  
57 extracted results we developed textual summaries and tables, which enabled us to identify  
58  
59  
60

1  
2 emerging themes. All three reviewers (CR, KLW and JW) examined and discussed the  
3  
4 findings of individual studies and by comparing similarities and contrasting findings we  
5  
6 condensed the number of themes. The level of agreement between reviewers in identifying  
7  
8 key themes was high, with only minor disagreements initially regarding some sub-themes  
9  
10 that were later collapsed into broader categories. Employing an iterative process with  
11  
12 discussions between all three reviewers a consensus was reached and we developed a final  
13  
14 narrative synthesis of key themes shared across studies[29]. We have used relevant quotes  
15  
16 from selected qualitative and mixed studies to illustrate our findings.  
17  
18

19  
20  
21 A systematic evaluation of the quality of the evidence was performed assigning a quality  
22  
23 score to each reference according to the Mixed Methods Appraisal Tool (MMAT)[30]. The  
24  
25 MMAT is a valid quality assessment tool for systematic reviews including qualitative,  
26  
27 quantitative and mixed methods studies and evaluates each study based on various criteria  
28  
29 specific for the different study designs. The highest possible score is 100% if all criteria are  
30  
31 met. Two reviewers (CR and KLW) assigned quality scores independently. The level of  
32  
33 agreement between reviewers was high and minor disagreement regarding only a few sub-  
34  
35 scores was resolved by discussion. Considering the limited number of studies and in line with  
36  
37 previous publications [20 31] we decided not to exclude studies based on the quality scores ,  
38  
39 but rather to take an inclusive approach aimed at identifying research that could give a  
40  
41 relevant contribution.  
42  
43  
44  
45  
46  
47

## 48 **RESULTS**

49  
50  
51 We initially identified 1442 articles, of which 121 were selected, based on the title and  
52  
53 abstract, for full-text evaluation (Figure 1). Of these, 19 articles reported information on  
54  
55 symptomatic patients with a false alarm, and considered the impact on symptom attribution,  
56  
57 help-seeking, or diagnostic delay for subsequent potential cancer symptoms.  
58  
59  
60

The most frequently studied cancer was breast cancer (n=7 studies), followed by gynaecological (n=3), colorectal (n=2), testicular (n=2), head and neck (n=2), brain cancer (n=1) and multiple cancer sites (n=2) (Table 1). The majority of studies were carried out in the UK (n=6) and the USA (n=6).

**Table 1: Summary information on included studies**

| Authors                | Country   | Study type and data collection method                                     | Participants                                                                                                                                     | Cancer site    | MMAT quality score |
|------------------------|-----------|---------------------------------------------------------------------------|--------------------------------------------------------------------------------------------------------------------------------------------------|----------------|--------------------|
| Bain et al (2002)      | UK        | Qualitative interviews                                                    | 95 cancer patients                                                                                                                               | Colorectal     | 100%               |
| Beacham et al (2004)   | USA       | Prospective observational (Telephone questionnaire)                       | 37 women with benign breast biopsy following self-detected lump, 65 following screening and control group of 76 women without biopsy             | Breast         | 50%                |
| Chapple et al (2004)   | UK        | Qualitative interviews                                                    | 45 cancer patients                                                                                                                               | Testicular     | 75%                |
| Evans et al (2007)     | UK        | Qualitative interviews                                                    | 43 cancer patients                                                                                                                               | Gynaecological | 100%               |
| Facione et al (1995)   | USA       | Qualitative interviews                                                    | 39 cancer patients                                                                                                                               | Breast         | 50%                |
| Facione et al (2006)   | USA       | Qualitative interviews                                                    | 28 women with possible breast cancer symptoms                                                                                                    | Breast         | 100%               |
| Fitch et al (2002)     | Canada    | Qualitative interviews                                                    | 18 cancer patients                                                                                                                               | Gynaecological | 25%                |
| Gascoigne et al (1999) | UK        | Qualitative interviews                                                    | 6 cancer patients (and 5 relatives)                                                                                                              | Testicular     | 75%                |
| Granek et al (2012)    | Canada    | Qualitative interviews                                                    | 14 cancer patients (and 7 partners)                                                                                                              | Breast         | 100%               |
| Heisey et al (2011)    | Canada    | Qualitative interviews                                                    | 14 cancer patients; 10 GPs                                                                                                                       | Breast         | 50%                |
| Janz et al (1990)      | USA       | Prospective observational (Telephone questionnaire)                       | 83 women with benign biopsy after self-discovered breast problem (and control group of 393 women with no breast problem)                         | Breast         | 75%                |
| Jones et al (2010)     | Australia | Cross-sectional (Telephone questionnaire)                                 | 3005 participants from the general population with potential breast cancer symptoms                                                              | Breast         | 50%                |
| Salander et al (1999)  | Sweden    | Qualitative interviews                                                    | 28 cancer patients and 27 spouses                                                                                                                | Brain          | 50%                |
| Scott et al (2007)     | UK        | Qualitative interviews                                                    | 57 cancer patients                                                                                                                               | Head and Neck  | 100%               |
| Siminoff et al (2011)  | USA       | Qualitative interviews (and review of medical records)                    | 242 cancer patients                                                                                                                              | Colorectal     | 100%               |
| Tarling et al (2013)   | UK        | Prospective observational (Mixed-methods: questionnaire and focus groups) | 55 women with non-cancer diagnosis after urgent referral for post-menopausal bleeding (35 completed questionnaire and 15 completed focus groups) | Gynaecological | 55%                |

|                        |        |                                                                                    |                                       |                |     |
|------------------------|--------|------------------------------------------------------------------------------------|---------------------------------------|----------------|-----|
| Tishelman et al (1998) | Sweden | Qualitative interviews                                                             | 46 cancer patients (and 29 relatives) | Multiple sites | 50% |
| Tromp et al (2005)     | NL     | Case-series (Mixed methods: questionnaire, interviews and physician questionnaire) | 306 cancer patients                   | Head and Neck  | 55% |
| Underwood et al (1994) | USA    | Qualitative interviews                                                             | 46 cancer patients                    | Multiple sites | 25% |

Most studies used qualitative methods (n=14), with quantitative (n=3) and mixed methods (n=2) less frequently employed. They were predominantly retrospective or cross-sectional, with only three having a prospective design. Sample sizes were mainly small and varied between 6 and 3005 participants (median 45; mean 242). The MMAT score was 100% for 6 studies, 75% for 3, 50-55% for 8 and 25% for 2 studies (Table 1). Shortcomings included insufficient consideration/information regarding the selection and the characteristics of study participants and insufficient consideration of the possible effects of bias, confounding and other methodological limitations on the study findings (further details available upon request).

The studies provided information on the following potential consequences of a false alarm: delayed help-seeking for cancer symptoms (n=17 studies), time to diagnosis/delay (n=15), experience of reassurance (n=15), symptom attribution (n=11), perceptions of having been dismissed by the doctor (n=10), lack of information or communication (n=7), and psychological effects (anxiety, distress, fear) (n=4). Despite differences by cancer site, study populations, and data collection methods, two broad themes emerged across studies: 'over-reassurance' and 'under-support'.



## 'Over-reassurance' following a non-cancer diagnosis

One of the main themes emerging across studies was patients explaining delay in help-seeking as due to reassurance from a previous benign or non-cancer diagnosis[21 32-45] (Table 2).

**Table 2: Factors influencing delayed help-seeking in relation to a previous all-clear diagnosis, based on the available evidence**

| Main themes                         | References                                                                                                                                                                                                                                                                                                                          |
|-------------------------------------|-------------------------------------------------------------------------------------------------------------------------------------------------------------------------------------------------------------------------------------------------------------------------------------------------------------------------------------|
| Reassurance                         | Bain et al (2002); Chapple et al (2004); Evans et al (2007); Facione et al (1995); Facione et al (2006); Fitch et al (2002); Gascoigne et al (1999); Heisey et al (2011); Jones et al (2010); Salander et al (1999); Scott et al (2007); Siminoff et al (2011); Tishelman et al (1998); Tromp et al (2005); Underwood et al (1994). |
| Symptom attribution                 | Bain et al (2002); Beacham et al (2004); Evans et al (2007); Facione et al (1995); Granek et al (2012); Heisey et al (2011); Janz et al (1990); Jones et al (2010); Salander et al (1999); Scott et al (2007); Tromp et al (2005).                                                                                                  |
| Perception of having been dismissed | Evans et al (2007); Facione et al (2006); Fitch et al (2002); Gascoigne et al (1999); Granek et al (2012); Heisey et al (2011); Salander et al (1999); Siminoff et al (2011); Tishelman et al (1998); Underwood et al (1994).                                                                                                       |
| Lack of information/communication   | Evans et al (2007); Facione et al (2006); Fitch et al (2002); Siminoff et al (2011); Tarling et al (2013); Tromp et al (2005); Underwood et al (1994).                                                                                                                                                                              |
| Anxiety, distress, fear             | Beacham et al (2004); Chapple et al (2004); Tarling et al (2013); Tromp et al (2005).                                                                                                                                                                                                                                               |

Among a general population sample of 3005 women with breast symptoms, the single most common reason for not seeing a doctor when experiencing a breast lump was that they had seen a doctor about it before (reported by 15.7% of women)[41]. A study of 242 colorectal cancer (CRC) patients showed that a delayed diagnosis was associated with having received an initial non-cancer diagnosis (10.2 months vs. 2.4 months;  $p < 0.001$ ), or having been initially told not to worry or to continue to monitor symptoms (6.8 months vs. 4.4 months;  $p = 0.006$ )[44]. A study of 306 head and neck cancer patients showed that delayed help-

1  
2 seeking was associated with patients interpreting symptoms as innocent partly because of  
3  
4 reassurance during the first visit[32].  
5

6  
7 Qualitative studies illustrate how over-reassurance can lead to normalization of symptoms  
8  
9 and subsequent delayed help-seeking: "*He [physician] gave me an examination and said*  
10  
11 *'there was nothing there'. So you go home and live with the problem.*"(No.20; CRC  
12  
13 patient)[33]. "*He (surgeon) did a colonoscopy...He was relieved because he didn't find*  
14  
15 *anything- so I did nothing for about two years and the blood wasn't getting any worse on the*  
16  
17 *toilet paper.*"(No. 48; CRC patient)[33].  
18  
19

20  
21 Having been reassured by previous examinations, some patients - and some physicians-  
22  
23 attributed subsequent symptoms to benign conditions[21 32 33 36 38 41-43 46]. Breast  
24  
25 cancer patients reported retrospectively: "*It was fibro [something]. Yeah, benign...So...I don't*  
26  
27 *know...I mean it was a few years later, the breast started to feel a similar kind of way. I said,*  
28  
29 *oh, it's the same thing, you know...And I ignored it.*"(P9)[21]. "*When I did an exam one day I*  
30  
31 *found a different lump in each breast. I was used to them...I was thinking, 'Oh, here we go*  
32  
33 *again.'* *And maybe for a minute you might think 'Gee, I hope it's not positive' but that went*  
34  
35 *very quickly. The more biopsies I had, the less concerned I was that they would be positive.*"  
36  
37 (Woman with four prior benign incisional biopsies)[36]. Some studies have even shown a  
38  
39 decrease in breast self-examination after a benign breast biopsy performed for a self-detected  
40  
41 lump[24 27].  
42  
43  
44  
45

46  
47 Similarly, ovarian cancer[38] and brain tumour patients[42] reported delays in help-seeking  
48  
49 and specialist referral because symptoms were attributed to a previous benign condition or  
50  
51 other reasonable explanations after an initial non-cancer diagnosis and negative tests.  
52

53  
54 Likewise, for testicular cancer, a diagnosis such as a cyst or urinary infection led to  
55  
56 subsequent interpretation of symptoms by patients and physicians in line with the previous  
57  
58 benign diagnosis, with delays in help-seeking and diagnosis of up to 12 months[40].  
59  
60

1  
2 It is possible that symptom characteristics might moderate the effect of a false alarm[32-34  
3  
4 38 39 42-44]. For example, among women with breast symptoms, a previous visit with a non-  
5  
6 cancer diagnosis was a relatively frequent explanation for delayed help-seeking in the case of  
7  
8 a breast lump (reported by 15.7% of women), while it was less frequently mentioned as a  
9  
10 reason for delay in the case of other symptoms, such as swelling in the armpit, pain or change  
11  
12 in breast shape or size[41].  
13  
14

### 19 **'Under-support' following a non-cancer diagnosis**

22 The second broad theme was the patient's perception of previously not having been taken  
23  
24 seriously, or symptoms having been dismissed as unimportant, as well as a sense of  
25  
26 humiliation or concern about appearing hypochondriacal[21 34 36-40 42 44-46] (Table 2).  
27  
28 Women with breast symptoms who had delayed seeking help for a year reported that the  
29  
30 delay was influenced by concerns about appearing hypochondriacal or foolish, following an  
31  
32 experience of being dismissed or treated with disrespect: "*I've had my symptoms dismissed*  
33  
34 *as frivolous twice*"[37]. "*Well, because I'd had identical symptoms over 20 years before,*  
35  
36 *years before, and it had been mastitis. And at that time I had worried about cancer and was*  
37  
38 *basically kind of laughed at and...and I felt foolish about how I'd been so worried...I was very*  
39  
40 *humiliated, I was very embarrassed.*" (Donna, 63, breast cancer)[46] "*...so having been*  
41  
42 *dismissed the first time, I said, I'm overreacting, just leave it alone. So that's why I'm saying*  
43  
44 *that my first experience kind of influenced me even getting the follow-up the first time I*  
45  
46 *noticed any slight change.*" (P9)[21]. Patients with testicular cancer also described long  
47  
48 delays before seeking help again for persistent symptoms: "*Saw the general (senior?)*  
49  
50 *registrar who examined me and told me there was nothing wrong with me and gave me one*  
51  
52 *hell of a telling off for not listening to his registrar, and politely told me to bugger off and not*  
53  
54 *to waste his time again.*"[40]. Similarly, gastro-intestinal cancer patients reported: "*They had*  
55  
56  
57  
58  
59  
60

1  
2 *a very negative attitude; I wasn't really believed. They said it was psychosomatic. I was*  
3  
4 *reluctant to try and get help after that.*"[34].  
5  
6

7  
8 A number of studies reported that previous visits with a non-cancer diagnosis left the patients  
9 frustrated, with a sense that doctors could not help them and uncertainty about what to do  
10 next; these factors contributed to subsequent delays[32 37-39 44 45 47]. Of 155 head and  
11 neck cancer patients having initially received an all-clear, 50% waited more than three weeks  
12 before returning to the doctor, and 10% more than four months; some explained their delay  
13 with the fact that the doctor could not help the first time[32]. Likewise, lack of explanation  
14 about the possible causes and meaning of symptoms, and lack of advice on further actions  
15 after investigations for post-menopausal bleeding can delay subsequent help-seeking[47].  
16 Women reported a sense of frustration and not knowing what to do in case of recurrent  
17 symptoms: "*It's the not knowing. It's more frustrating. Why is it still happening? Mine has*  
18 *not changed that much. After going through all that. It puts you off going again, because they*  
19 *don't know and they don't tell you anything else.*"(P2)[47]. Similar explanations for delayed  
20 help-seeking were reported by breast cancer patients[37] [45]: "*I've had no relief from seeing*  
21 *a physician.*"[37] Also ovarian cancer patients explained delays as due to frustration and not  
22 having previously discussed with the doctor any alternative diagnostic hypothesis or planned  
23 any follow-up or further actions[38]. Among CRC patients, lack of communication of the  
24 next steps during the initial visit was associated with longer diagnostic delay (8.2 months vs.  
25 3.4 months;  $p < 0.001$ )[44].  
26  
27  
28  
29  
30  
31  
32  
33  
34  
35  
36  
37  
38  
39  
40  
41  
42  
43  
44  
45  
46  
47

48 The other explanation for delay was anxiety or distress following the previous non-cancer  
49 diagnosis, reported by some women with recurrent post-menopausal bleeding after a false  
50 alarm[47], and by some head and neck cancer patients[32]. Among patients with testicular  
51 cancer, some reported fear of painful investigations following previous health examinations:  
52 "*And then when I did go and see this GP, there was a locum, and he gave me an inspection,*  
53  
54  
55  
56  
57  
58  
59  
60

1  
2 *and I found it quite uncomfortable, the way he went about the inspection. And so I further*  
3 *delayed. You know, he had referred me to somebody else. And I delayed that..." "...it was*  
4 *excruciatingly painful, you know, I didn't like that, you know, and I suppose anyone does like*  
5 *that sort of thing. Anyway, it was my own fault that I delayed the thing."*(T45)[35].  
6  
7  
8  
9  
10

## 11 12 13 **DISCUSSION**

14  
15  
16 An 'all-clear' or non-cancer diagnosis can be associated with subsequent delays in help-  
17 seeking in the case of new or recurrent possible cancer symptoms. Our review of a largely  
18 qualitative literature has shown that across different cancer sites and study populations, some  
19 common themes emerged to help explain the relationship between a false alarm and  
20 subsequent delays. The two main themes were 'over-reassurance', resulting in subsequent  
21 attribution of symptoms to the initial benign diagnosis or normalizing of symptoms, and  
22 'under-support', resulting in symptomatic patients being unwilling to seek medical attention  
23 again. Many of the studies report on prolonged delays, suggesting that the effects of a false  
24 alarm can be long-lasting, and may generalize beyond recurrence of the original symptom to  
25 new symptoms appearing some time later. In the case of breast symptoms, a benign  
26 diagnosis appeared to give some women a false sense of security persisting for many years.  
27  
28  
29  
30  
31  
32  
33  
34  
35  
36  
37  
38  
39

40  
41 This sense of security is at odds with the need to remain vigilant, particularly in the light of  
42 recent evidence showing that women with a histologically proven benign breast biopsy can  
43 have a 2-3 fold increased risk of being subsequently diagnosed with breast cancer[48 49].  
44  
45  
46  
47

48 Around 2% of women with a benign breast disease are diagnosed with breast cancer during  
49 the following 7 years[49], with the lesion being considered a marker for increased risk, rather  
50 than a premalignant lesion in itself. In a single institution study in the US, 13% of breast  
51 cancer diagnoses involved women presenting with a palpable mass who had a negative  
52 mammogram within the last year, and 21% had had a mammogram one year or more  
53  
54  
55  
56  
57  
58  
59  
60

1  
2 before[50]. Also for CRC, there is evidence supporting the need to remain vigilant even after  
3  
4 negative investigations: up to 8% of cases are diagnosed within three to five years of a  
5  
6 negative colonoscopy, possibly because of missed cancers or cancers arising from missed or  
7  
8 incompletely removed polyps[51]. In a single institution study in the UK, the diagnostic yield  
9  
10 of a second urgent referral, although lower than the first referral (5% vs 10%), is not  
11  
12 insignificant[52].  
13

14  
15  
16 Our review has shown that under-supporting patients receiving an all-clear diagnosis can  
17  
18 negatively impact future symptom interpretation and help-seeking. The perception that  
19  
20 symptoms were previously dismissed as unimportant was a relevant theme explaining  
21  
22 subsequent delays, most often because of not wanting to appear hypochondriacal. Patients'  
23  
24 concerns about wasting the doctor's time, which previous studies reported as a common  
25  
26 barrier for help-seeking in the UK[20 53 54], was mentioned by some patients, but appeared  
27  
28 to play a less relevant role.  
29  
30

31  
32 Fear of cancer or of the consequences of treatment has been previously shown to be a barrier  
33  
34 for help-seeking[20 55]. Our review suggested that fear of examinations or high anxiety  
35  
36 levels after a false alarm contributed to delays only in a minority of cases. Other factors  
37  
38 seemed more relevant, such as a sense of frustration, uncertainty about what to do next, and  
39  
40 not having discussed any alternative diagnostic hypothesis or follow-up at the time of the  
41  
42 initial consultation.  
43  
44

45  
46 The need to provide patients with more information in the case of a non-cancer diagnosis has  
47  
48 also been highlighted in a study on 'straight to test' endoscopy services for suspected  
49  
50 CRC[56]: more than 30% of patients would prefer to see a specialist even after normal or  
51  
52 benign test results. A clinical encounter providing information before and after diagnostic  
53  
54 investigations may be valuable to ensure that bodily sensations are not dismissed following  
55  
56 negative examinations, and to discuss next steps in the case of recurrent or new symptoms.  
57  
58  
59  
60

1  
2 Our review and previous studies[42 57] have shown that over-reassurance from normal test  
3 results or a benign diagnosis can influence patients and healthcare providers, possibly  
4 affecting time to diagnosis. Planned follow-up soon after the initial diagnosis can help  
5 mitigate the risks associated with overconfidence in the first diagnosis; it allows the clinician  
6 to apply more conscious problem-solving and for the possibility of alternative diagnostic  
7 hypothesis to emerge, with symptom changes guiding this process[58]. Primary care  
8 physicians can also be under-supported in terms of not having sufficient access to diagnostic  
9 investigations[8 59]. For example, one in ten GPs in the UK had tests for ovarian cancer  
10 refused[60]. Further studies based on healthcare providers' experiences are needed.

11  
12 In the UK, urgent cancer examinations have risen over time, but this is inevitably followed by  
13 a decrease in the diagnostic yield[52 61]. More patients will experience a false alarm as a  
14 consequence of initiatives promoting earlier symptomatic presentation and improved access  
15 to diagnostic investigations[8 9]. Despite being unavoidable if early diagnosis and survival  
16 are to be improved, especially for cancers presenting with non-specific symptoms and in the  
17 absence of accurate markers for discriminating between high and low risk individuals, effort  
18 is required to minimize unintended consequences. Significant event audits in primary care  
19 have highlighted the need to find a balance between avoiding unnecessary anxiety in  
20 symptomatic patients and the potential risks of over-reassuring patients with an all-clear  
21 diagnosis[57]. Recommendations similar to those developed for children with acute diseases  
22 have been suggested for safety-netting and preventing delays in cancer diagnosis[57 62].  
23 These include communicating to patients that there is uncertainty and that more visits might  
24 be necessary for reaching a diagnosis, explaining exactly what symptoms merit special  
25 attention, giving advice on how to seek help if necessary, and explaining the expected  
26 development of the illness over time.



1  
2 Providing balanced information and involving patients in monitoring their symptoms and  
3  
4 bodily sensations are also relevant in other contexts, such as cancer screening[63], fast-track  
5  
6 referral systems[64] and early detection of recurrent cancers[65]. Electronic tools have been  
7  
8 developed supporting people with cancer to prospectively collect patient reported data and for  
9  
10 helping clinicians to monitor trends of symptom severity[66]. Similar instruments could also  
11  
12 be used to help monitor the evolution of symptoms in individuals with persistent or recurrent  
13  
14 symptoms after a false alarm with potential beneficial effects in terms of providing support  
15  
16 and limiting over-reassurance.  
17  
18

19  
20  
21 Even though the relevance of patient self-monitoring and awareness of bodily changes is  
22  
23 recognized in cancer awareness campaigns (www.cheekycheckup.com.au;  
24  
25 www.cancerresearchuk.org) and during clinical encounters, there is a lack of specific advice  
26  
27 and tools for patients with false alarms.  
28  
29

30  
31 Our findings on symptomatic patients with a false alarm are in line with some screening-  
32  
33 related studies: women with previous negative screening mammograms and later diagnosed  
34  
35 with interval breast cancer explained delayed help-seeking in part due to previous over-  
36  
37 reassurance and under-support[67]. Moreover, recent systematic reviews on the impact of  
38  
39 false-positive screening mammograms in the UK[23] have shown long lasting distress for up  
40  
41 to 3 years and a lower likelihood to re-attend subsequent screening assessments. There is  
42  
43 some weak indication that these negative effects could be overcome by improving  
44  
45 communication and providing tailored information[68]. However, other reviews on false-  
46  
47 positive screening results referring to European, Canadian and US populations showed  
48  
49 conflicting evidence[22 69] and more research is needed to understand the effects of false  
50  
51 alarms following screening as well as following symptomatic presentation.  
52  
53  
54

55  
56 It should be noted that even though studies referring to screened and to symptomatic  
57  
58 individuals can complement each other in the attempt to increase our understanding of the  
59  
60



1  
2  
3  
4  
5  
6  
7  
8  
9  
10  
11  
12  
13  
14  
15  
16  
17  
18  
19  
20  
21  
22  
23  
24  
25  
26  
27  
28  
29  
30  
31  
32  
33  
34  
35  
36  
37  
38  
39  
40  
41  
42  
43  
44  
45  
46  
47  
48  
49  
50  
51  
52  
53  
54  
55  
56  
57  
58  
59  
60

psychological and behavioural consequences of a false alarm, the results are not directly transferable to different contexts. This can be exemplified by studies showing that breast self-examination was more likely to decrease among women with a benign diagnosis following a self-identified lump, while it more likely increased if the breast problem was discovered by the healthcare system[24].

There are some limitations to our review. The majority of studies did not have the specific objective of evaluating false alarms, and relevant information emerged only after in-depth examination of full-text publications. Thus, we cannot exclude the possibility that some studies were not identified in our review. The included studies were limited by small sample size, retrospective design and lack of control groups. As the majority of studies were retrospective or cross-sectional and based on reports by cancer patients', recall bias might have influenced the findings. When patients are asked to recall experiences and reasons for delays after having been diagnosed with cancer, their answers might mask a sense of guilt if they neglected symptoms or delayed help-seeking[67]. More prospective studies are needed, also including information provided by healthcare professionals.

The majority of studies were conducted in English-speaking countries, mainly the UK and the USA, with a few from Northern Europe. This might reflect policies and initiatives addressing earlier cancer diagnosis having taken place in these countries. Publication bias might also influence the number of studies from different countries. More international comparisons, including central and southern European countries could provide a different perspective on common issues.

An 'all-clear' diagnosis in terms of cancer can result from a variety of different clinical scenarios, including a true benign diagnosis, a false negative result, or the healthcare provider attributing symptoms to alternative explanations. Our study was not able to stratify by these factors, but we did not identify any specific differences regarding the effect on reassurance,

1 symptom interpretation and help-seeking, of either type of, or time since, the false alarm.

2  
3  
4 Larger prospective studies are needed to explore these issues.

5  
6  
7 In conclusion, we found that a false alarm can influence subsequent symptom attribution and  
8  
9 help-seeking, principally through patients being either 'over-reassured' or 'under-supported'  
10  
11 in relation to future symptoms. Providing patients with appropriate balanced information  
12  
13 when investigations rule out cancer may help to prevent subsequent delays. Prospective  
14  
15 studies are needed to identify forms of patient-information that limit unintended  
16  
17 consequences of false alarms.  
18  
19  
20  
21

22 **Financial support:** This work was supported by Cancer Research UK [C48748/A16867]

23  
24 **Conflict of interest:** The authors have no conflict of interest to declare.

25  
26  
27 **Data sharing:** Extra data on the quality appraisal of the included studies is available by  
28  
29 emailing [c.renzi@ucl.ac.uk](mailto:c.renzi@ucl.ac.uk)

30  
31 **Contributorship statement:** CR and JW designed the study. CR was responsible for data  
32  
33 collection. CR and KLW performed data extraction and appraising studies. CR, KLW and JW  
34  
35 contributed to data analysis and interpretation. CR wrote the first draft of the manuscript. All  
36  
37 authors reviewed the manuscript and approved the final version. CR is responsible for the  
38  
39 overall content as the corresponding author.  
40  
41  
42

## 43 REFERENCES

- 44  
45  
46 1. Richards MA, Westcombe AM, Love SB, et al. Influence of delay on survival in patients  
47  
48 with breast cancer: a systematic review. *Lancet* 1999;**353**(9159):1119-26  
49  
50 2. Mitchell E, Macdonald S, Campbell NC, et al. Influences on pre-hospital delay in the  
51  
52 diagnosis of colorectal cancer: a systematic review. *Br J Cancer* 2008;**98**(1):60-  
53  
54 70 doi: 10.1038/sj.bjc.6604096[published Online First: Epub Date]].  
55  
56 3. Hamilton W, Green T, Martins T, et al. Evaluation of risk assessment tools for  
57  
58 suspected cancer in general practice: a cohort study. *British Journal of General  
59  
60 Practice* 2013;**63**(606):e30-e36 doi: 10.3399/bjgp13X660751[published Online  
First: Epub Date]].  
4. Berrino F, De Angelis R, Sant M, et al. Survival for eight major cancers and all cancers  
combined for European adults diagnosed in 1995-99: results of the EURO-CARE-4

- 1  
2 study. *The Lancet Oncology* 2007;**8**(9):773-83 doi: 10.1016/S1470-  
3 2045(07)70245-0[published Online First: Epub Date]].
- 4  
5 5. Coleman MP, Forman D, Bryant H, et al. Cancer survival in Australia, Canada,  
6 Denmark, Norway, Sweden, and the UK, 1995-2007 (the International Cancer  
7 Benchmarking Partnership): an analysis of population-based cancer registry  
8 data. *Lancet* 2011;**377**(9760):127-38 doi: 10.1016/s0140-6736(10)62231-  
9 3[published Online First: Epub Date]].
- 10  
11 6. Macleod U, Mitchell ED, Burgess C, et al. Risk factors for delayed presentation and  
12 referral of symptomatic cancer: evidence for common cancers. *Br J Cancer*  
13 2009;**101 Suppl 2**:S92-S101 doi: 10.1038/sj.bjc.6605398[published Online  
14 First: Epub Date]].
- 15  
16 7. Richards MA. The size of the prize for earlier diagnosis of cancer in England. *Br J*  
17 *Cancer* 2009;**101 Suppl 2**:S125-9 doi: 10.1038/sj.bjc.6605402[published Online  
18 First: Epub Date]].
- 19  
20 8. Rubin G, Vedsted P, Emery J. Improving cancer outcomes: better access to diagnostics  
21 in primary care could be critical. *British Journal of General Practice*  
22 2011;**61**(586):317-18 doi: 10.3399/bjgp11X572283[published Online First:  
23 Epub Date]].
- 24  
25 9. Cancer Research UK. National Awareness and Early Diagnosis Initiative. Accessed at  
26 [http://www.cancerresearchuk.org/cancer-](http://www.cancerresearchuk.org/cancer-info/spotcancerearly/naedi/AboutNAEDI/)  
27 [info/spotcancerearly/naedi/AboutNAEDI/](http://www.cancerresearchuk.org/cancer-info/spotcancerearly/naedi/AboutNAEDI/) on July 10th 2014. Secondary  
28 National Awareness and Early Diagnosis Initiative. Accessed at  
29 [http://www.cancerresearchuk.org/cancer-](http://www.cancerresearchuk.org/cancer-info/spotcancerearly/naedi/AboutNAEDI/)  
30 [info/spotcancerearly/naedi/AboutNAEDI/](http://www.cancerresearchuk.org/cancer-info/spotcancerearly/naedi/AboutNAEDI/) on July 10th 2014.  
31
- 32  
33 10. Thorne K, Hutchings HA, Elwyn G. The effects of the Two-Week Rule on NHS  
34 colorectal cancer diagnostic services: a systematic literature review. *BMC health*  
35 *services research* 2006;**6**:43 doi: 10.1186/1472-6963-6-43[published Online  
36 First: Epub Date]].
- 37  
38 11. Pelletier M, Knauper B, Loiselle CG, et al. Moderators of psychological recovery from  
39 benign cancer screening results. *Current oncology* 2012;**19**(3):e191-200 doi:  
40 10.3747/co.19.935[published Online First: Epub Date]].
- 41  
42 12. Baughan P, Keatings J, O'Neill B. Urgent suspected cancer referrals from general  
43 practice: audit of compliance with guidelines and referral outcomes. *The British*  
44 *journal of general practice : the journal of the Royal College of General*  
45 *Practitioners* 2011;**61**(592):e700-6 doi: 10.3399/bjgp11X606591[published  
46 Online First: Epub Date]].
- 47  
48 13. Montgomery M, McCrone SH. Psychological distress associated with the diagnostic  
49 phase for suspected breast cancer: systematic review. *J Adv Nurs*  
50 2010;**66**(11):2372-90 doi: 10.1111/j.1365-2648.2010.05439.x[published Online  
51 First: Epub Date]].
- 52  
53 14. Andrykowski MA, Carpenter JS, Studts JL, et al. Psychological impact of benign breast  
54 biopsy: A longitudinal, comparative study. *Health Psychology* 2002;**21**(5):485-94  
55 doi: 10.1037//0278-6133.21.5.485[published Online First: Epub Date]].
- 56  
57 15. Witek-Janusek L, Gabram S, Mathews HL. Psychologic stress, reduced NK cell  
58 activity, and cytokine dysregulation in women experiencing diagnostic breast  
59 biopsy. *Psychoneuroendocrinology* 2007;**32**(1):22-35 doi:  
60 10.1016/j.psyneuen.2006.09.011[published Online First: Epub Date]].

16. Arndt V, Stürmer T, Stegmaier C, et al. Provider Delay Among Patients With Breast Cancer in Germany: A Population-Based Study. *Journal of Clinical Oncology* 2003;**21**(8):1440-46 doi: 10.1200/jco.2003.08.071[published Online First: Epub Date]].
17. Arndt V, Sturmer T, Stegmaier C, et al. Patient delay and stage of diagnosis among breast cancer patients in Germany - a population based study. *Br J Cancer* 2002;**86**(7):1034-40
18. Hogberg C, Karling P, Rutegard J, et al. Immunochemical faecal occult blood tests in primary care and the risk of delay in the diagnosis of colorectal cancer. *Scandinavian journal of primary health care* 2013;**31**(4):209-14 doi: 10.3109/02813432.2013.850205[published Online First: Epub Date]].
19. Macdonald S, Macleod U, Campbell NC, et al. Systematic review of factors influencing patient and practitioner delay in diagnosis of upper gastrointestinal cancer. *Br J Cancer* 2006;**94**(9):1272-80 doi: 10.1038/sj.bjc.6603089[published Online First: Epub Date]].
20. Smith LK, Pope C, Botha JL. Patients' help-seeking experiences and delay in cancer presentation: a qualitative synthesis. *The Lancet* 2005;**366**(9488):825-31 doi: 10.1016/s0140-6736(05)67030-4[published Online First: Epub Date]].
21. Heisey R, Clemons M, Granek L, et al. Health care strategies to promote earlier presentation of symptomatic breast cancer: perspectives of women and family physicians. *Current oncology* 2011;**18**(5):e227-37
22. Brewer NT, Salz T, Lillie SE. Systematic review: the long-term effects of false-positive mammograms. *Annals of internal medicine* 2007;**146**(7):502-10
23. Bond M, Pavey T, Welch K, et al. Psychological consequences of false-positive screening mammograms in the UK. *Evidence-based medicine* 2013;**18**(2):54-61 doi: 10.1136/eb-2012-100608[published Online First: Epub Date]].
24. Janz NK, Becker MH, Haefner DP, et al. Determinants of breast self-examination after a benign biopsy. *American journal of preventive medicine* 1990;**6**(2):84-92
25. Scott SE, Walter FM, Webster A, et al. The model of pathways to treatment: conceptualization and integration with existing theory. *Br J Health Psychol* 2013;**18**(1):45-65 doi: 10.1111/j.2044-8287.2012.02077.x[published Online First: Epub Date]].
26. T G, R P. Effectiveness and efficiency of search methods in systematic reviews of complex evidence: audit of primary sources. *BMJ* 2005;**331**:1064-65
27. Beacham AO, Carpenter JS, Andrykowski MA. Impact of benign breast biopsy upon breast self-examination. *Preventive medicine* 2004;**38**(6):723-31 doi: 10.1016/j.ypmed.2004.01.006[published Online First: Epub Date]].
28. Dixon-Woods M, Bonas S, Booth A, et al. How can systematic reviews incorporate qualitative research? A critical perspective. *Qualitative Research* 2006;**6**(1):27-44 doi: 10.1177/1468794106058867[published Online First: Epub Date]].
29. Petticrew M, Rehfuess E, Noyes J, et al. Synthesizing evidence on complex interventions: how meta-analytical, qualitative, and mixed-method approaches can contribute. *Journal of clinical epidemiology* 2013;**66**(11):1230-43 doi: 10.1016/j.jclinepi.2013.06.005[published Online First: Epub Date]].
30. Pace R, Pluye P, Bartlett G, et al. Testing the reliability and efficiency of the pilot Mixed Methods Appraisal Tool (MMAT) for systematic mixed studies review. *International Journal of Nursing Studies* 2012;**49**(1):47-53 doi: <http://dx.doi.org/10.1016/j.ijnurstu.2011.07.002>[published Online First: Epub Date]].

- 1  
2  
3 31. Dubayova T, van Dijk JP, Nagyova I, et al. The impact of the intensity of fear on  
4 patient's delay regarding health care seeking behavior: a systematic review. *Int J*  
5 *Public Health* 2010;**55**(5):459-68 doi: 10.1007/s00038-010-0149-0[published  
6 Online First: Epub Date]].
- 7 32. Tromp DM, Brouha XD, Hordijk G-J, et al. Patient factors associated with delay in  
8 primary care among patients with head and neck carcinoma: A case-series  
9 analysis. *Family Practice* 2005;**22**(5):554-59
- 10 33. Bain NS, Campbell NC, Ritchie LD, et al. Striking the right balance in colorectal cancer  
11 care—a qualitative study of rural and urban patients. *Family Practice*  
12 2002;**19**(4):369-74 doi: 10.1093/fampra/19.4.369[published Online First: Epub  
13 Date]].
- 14 34. Tishelman C, Sachs L. The Diagnostic Process and the Boundaries of Normality.  
15 *Qualitative Health Research* 1998;**8**(1):48-60 doi:  
16 10.1177/104973239800800104[published Online First: Epub Date]].
- 17 35. Chapple A, Ziebland S, McPherson A. Qualitative study of men's perceptions of why  
18 treatment delays occur in the UK for those with testicular cancer. *British Journal*  
19 *of General Practice* 2004;**54**(498):25-32
- 20 36. Facione NC, Dodd MJ. Women's narratives of helpseeking for breast cancer. *Cancer*  
21 *Practice* 1995;**3**(4):219-25
- 22 37. Facione NC, Facione PA. The cognitive structuring of patient delay in breast cancer.  
23 *Social Science & Medicine* 2006;**63**(12):3137-49
- 24 38. Evans J, Ziebland S, McPherson A. Minimizing delays in ovarian cancer diagnosis: an  
25 expansion of Andersen's model of 'total patient delay'. *Family Practice*  
26 2007;**24**(1):48-55 doi: 10.1093/fampra/cml063[published Online First: Epub  
27 Date]].
- 28 39. Fitch M, Deane K, Howell D, et al. Women's experiences with ovarian cancer:  
29 reflections on being diagnosed. *Can Oncol Nurs J* 2002;**12**(3):152-68
- 30 40. Gascoigne P, Mason M, Roberts E. Factors affecting presentation and delay in  
31 patients with testicular cancer: Results of a qualitative study. *Psycho-Oncology*  
32 1999;**8**(2):144-54
- 33 41. Jones SC, Gregory P, Nehill C, et al. Australian women's awareness of breast cancer  
34 symptoms and responses to potential symptoms. *Cancer Causes and Control*  
35 2010;**21**(6):945-58
- 36 42. Salander P, Bergenheim AT, Hamberg K, et al. Pathways from symptoms to medical  
37 care: a descriptive study of symptom development and obstacles to early  
38 diagnosis in brain tumour patients. *Family Practice* 1999;**16**(2):143-48 doi:  
39 10.1093/fampra/16.2.143[published Online First: Epub Date]].
- 40 43. Scott SE, McGurk M, Grunfeld EA. The process of symptom appraisal: Cognitive and  
41 emotional responses to detecting potentially malignant oral symptoms. *Journal*  
42 *of Psychosomatic Research* 2007;**62**(6):621-30
- 43 44. Siminoff LA, Rogers HL, Thomson MD, et al. Doctor, what's wrong with me? Factors  
44 that delay the diagnosis of colorectal cancer. *Patient Education and Counseling*  
45 2011;**84**(3):352-58
- 46 45. Underwood SM, Hoskins D, Cummins T, et al. Obstacles to cancer care: focus on the  
47 economically disadvantaged. *Oncol Nurs Forum* 1994;**21**(1):47-52
- 48 46. Granek L, Fergus K. Resistance, agency, and liminality in women's accounts of  
49 symptom appraisal and help-seeking upon discovery of a breast irregularity. *Soc*  
50 *Sci Med* 2012;**75**(10):1753-61 doi: 10.1016/j.socscimed.2012.07.016[published  
51 Online First: Epub Date]].
- 52  
53  
54  
55  
56  
57  
58  
59  
60



- 1  
2  
3  
4  
5  
6  
7  
8  
9  
10  
11  
12  
13  
14  
15  
16  
17  
18  
19  
20  
21  
22  
23  
24  
25  
26  
27  
28  
29  
30  
31  
32  
33  
34  
35  
36  
37  
38  
39  
40  
41  
42  
43  
44  
45  
46  
47  
48  
49  
50  
51  
52  
53  
54  
55  
56  
57  
58  
59  
60
47. Tarling R, Gale A, Martin-Hirsch P, et al. Experiences of women referred for urgent assessment of postmenopausal bleeding (PMB). *J Obstet Gynaecol* 2013;**33**(2):184-7 doi: 10.3109/01443615.2012.740529[published Online First: Epub Date]].
48. Shin S, Schneider HB, Cole FJ, Jr., et al. Follow-up recommendations for benign breast biopsies. *The breast journal* 2006;**12**(5):413-7 doi: 10.1111/j.1075-122X.2006.00302.x[published Online First: Epub Date]].
49. Goldacre MJ, Abisgold JD, Yeates DG, et al. Benign breast disease and subsequent breast cancer: English record linkage studies. *Journal of public health* 2010;**32**(4):565-71 doi: 10.1093/pubmed/fdq001[published Online First: Epub Date]].
50. Haakinson DJ, Stucky CC, Dueck AC, et al. A significant number of women present with palpable breast cancer even with a normal mammogram within 1 year. *Am J Surg* 2010;**200**(6):712-7; discussion 17-8 doi: 10.1016/j.amjsurg.2010.08.005[published Online First: Epub Date]].
51. Dominitz JA, Robertson DJ. Editorial: Interval Cancers: Learning from the Past as We Build for the Future. *The American journal of gastroenterology* 2013;**108**(8):1341-43 doi: 10.1038/ajg.2013.177[published Online First: Epub Date]].
52. Vaughan-Shaw PG, Cutting JE, Borley NR, et al. Repeat 2-week wait referrals for colorectal cancer. *Colorectal disease : the official journal of the Association of Coloproctology of Great Britain and Ireland* 2013;**15**(3):292-7 doi: 10.1111/j.1463-1318.2012.03173.x[published Online First: Epub Date]].
53. Robb K, Stubbings S, Ramirez A, et al. Public awareness of cancer in Britain: a population-based survey of adults. *Br J Cancer* 2009;**101 Suppl 2**:S18-23 doi: 10.1038/sj.bjc.6605386[published Online First: Epub Date]].
54. Forbes LJ, Simon AE, Warburton F, et al. Differences in cancer awareness and beliefs between Australia, Canada, Denmark, Norway, Sweden and the UK (the International Cancer Benchmarking Partnership): do they contribute to differences in cancer survival? *Br J Cancer* 2013;**108**(2):292-300 doi: 10.1038/bjc.2012.542[published Online First: Epub Date]].
55. Beeken RJ, Simon AE, von Wagner C, et al. Cancer fatalism: deterring early presentation and increasing social inequalities? *Cancer epidemiology, biomarkers & prevention : a publication of the American Association for Cancer Research, cosponsored by the American Society of Preventive Oncology* 2011;**20**(10):2127-31 doi: 10.1158/1055-9965.epi-11-0437[published Online First: Epub Date]].
56. Hitchins CR, Lawn A, Whitehouse G, et al. The Straight To Test Endoscopy Service for Suspected Colorectal Cancer: meeting national targets but are we meeting our patients' expectations? *Colorectal disease : the official journal of the Association of Coloproctology of Great Britain and Ireland* 2014 doi: 10.1111/codi.12613[published Online First: Epub Date]].
57. Mitchell ED, Rubin G, Macleod U. Understanding diagnosis of lung cancer in primary care: qualitative synthesis of significant event audit reports. *British Journal of General Practice* 2013;**63**(606):e37-e46 doi: 10.3399/bjgp13X660760[published Online First: Epub Date]].
58. Berner ES, Graber ML. Overconfidence as a Cause of Diagnostic Error in Medicine. *The American Journal of Medicine* 2008;**121**(5, Supplement):S2-S23 doi: <http://dx.doi.org/10.1016/j.amjmed.2008.01.001%5Bpublished> Online First: Epub Date]].

- 1  
2  
3  
4  
5  
6  
7  
8  
9  
10  
11  
12  
13  
14  
15  
16  
17  
18  
19  
20  
21  
22  
23  
24  
25  
26  
27  
28  
29  
30  
31  
32  
33  
34  
35  
36  
37  
38  
39  
40  
41  
42  
43  
44  
45  
46  
47  
48  
49  
50  
51  
52  
53  
54  
55  
56  
57  
58  
59  
60
59. Vedsted P, Olesen F. Are the serious problems in cancer survival partly rooted in gatekeeper principles? An ecologic study. *The British journal of general practice : the journal of the Royal College of General Practitioners* 2011;**61**(589):e508-12 doi: 10.3399/bjgp11X588484[published Online First: Epub Date]].
60. Target Ovarian Cancer. The 2012 Target Ovarian Cancer Pathfinder Study. Accessed at <http://www.targetovariancancer.org.uk> on July 10th 2014. Secondary Target Ovarian Cancer. The 2012 Target Ovarian Cancer Pathfinder Study. Accessed at <http://www.targetovariancancer.org.uk> on July 10th 2014.
61. Allgar VL, Neal RD, Ali N, et al. Urgent GP referrals for suspected lung, colorectal, prostate and ovarian cancer. *The British journal of general practice : the journal of the Royal College of General Practitioners* 2006;**56**(526):355-62
62. Almond S, Mant D, Thompson M. Diagnostic safety-netting. *The British journal of general practice : the journal of the Royal College of General Practitioners* 2009;**59**(568):872-4; discussion 74 doi: 10.3399/bjgp09X472971[published Online First: Epub Date]].
63. Brett J, Bankhead C, Henderson B, et al. The psychological impact of mammographic screening. A systematic review. *Psychooncology* 2005;**14**(11):917-38 doi: 10.1002/pon.904[published Online First: Epub Date]].
64. Ndukwe N, Borowski DW, Lee A, et al. The two-week rule for suspected colorectal cancer: Patient experience and psychological impact. *International Journal of Health Care Quality Assurance* 2012;**25**(1):75-85 doi: 10.1108/09526861211192421[published Online First: Epub Date]].
65. Montgomery DA, Krupa K, Cooke TG. Follow-up in breast cancer: does routine clinical examination improve outcome? A systematic review of the literature. *Br J Cancer* 2007;**97**(12):1632-41 doi: 10.1038/sj.bjc.6604065[published Online First: Epub Date]].
66. Abernethy AP, Zafar SY, Uronis H, et al. Validation of the Patient Care Monitor (Version 2.0): a review of system assessment instrument for cancer patients. *Journal of pain and symptom management* 2010;**40**(4):545-58 doi: 10.1016/j.jpainsymman.2010.01.017[published Online First: Epub Date]].
67. Solbjør M, Skolbekken JA, Saetnan AR, et al. Could screening participation bias symptom interpretation? An interview study on women's interpretations of and responses to cancer symptoms between mammography screening rounds. *BMJ open* 2012;**2**(6) doi: 10.1136/bmjopen-2012-001508[published Online First: Epub Date]].
68. Bond M, Pavey T, Welch K, et al. Systematic review of the psychological consequences of false-positive screening mammograms. *Health technology assessment (Winchester, England)* 2013;**17**(13):1-170, v-vi doi: 10.3310/hta17130[published Online First: Epub Date]].
69. Salz T, DeFrank JT, Brewer NT. False positive mammograms in Europe: do they affect reattendance? *Breast cancer research and treatment* 2011;**127**(1):229-31 doi: 10.1007/s10549-010-1245-9[published Online First: Epub Date]].

1  
2  
3  
4  
5  
6  
7  
8  
9  
10  
11  
12  
13  
14  
15  
16  
17  
18  
19  
20  
21  
22  
23  
24  
25  
26  
27  
28  
29  
30  
31  
32  
33  
34  
35  
36  
37  
38  
39  
40  
41  
42  
43  
44  
45  
46  
47  
48  
49  
50  
51  
52  
53  
54  
55  
56  
57  
58  
59  
60

Figure 1: Flow of studies

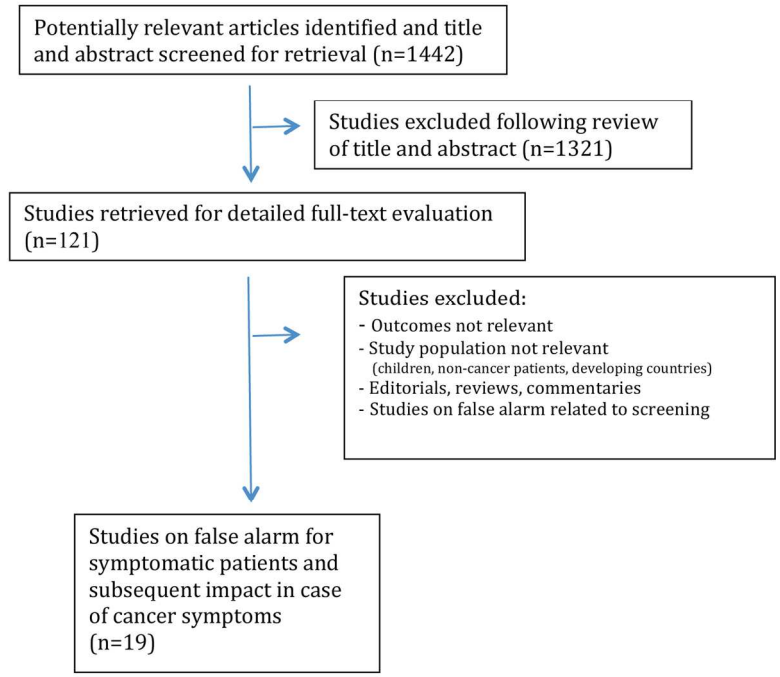

173x138mm (300 x 300 DPI)

Peer Review Only
